## SUPPLEMENTAL MATERIAL TABLE OF CONTENTS

**Appendix A.** Initial search criteria used for MEDLINE.

**Appendix B.** Checklist MOOSE Guidelines for Meta-Analyses and Systematic Reviews of Observational Studies.

**Appendix C.** PRISMA 2009 Checklist.

**Appendix D.** Study quality score for each individual study.

**Appendix E.** Tables presenting study design, characteristics, diagnostic criteria for a negative test result, follow-up duration, absolute numbers for death, cardiac death, myocardial infarction, revascularization and unstable angina if reported or annualized event rates for the occurrence of cardiac death and myocardial infarction after a negative test result and total event rate for each study including references.

**Appendix F.** Annualized event rates for cardiac death and myocardial infarction after a negative test result. The annualized event rates (AER) per individual study and pooled AER per modality are presented in Forest plots.

**Appendix G.** Annualized event rates for cardiac death and myocardial infarction after a negative test result stratified for study design and follow-up duration.

**Appendix H.** Meta-regression results regarding Figure 2. Table shows that differences in annualized event rates (AER) after a negative test result between modalities and overall heterogeneity become smaller after adjustment for total AER and proportion of patients with pre-existing coronary artery disease.

## **Appendix A: Search criteria Medline**

### **Search terms / MESH**

- Exercise test
- Bicycle ergometry test
- Electrocardiography
- Magnetic resonance imaging
- Single photon emission computed tomography
- Positron emission tomography
- Stress echocardiography
- Computed tomography
- X-ray
- Prognosis
- Coronary artery disease

### **Search limitations**

- Language: English
- Publication dates: January 1990 – April 2015

### **Initial search strategy Medline**

- computed tomography, x ray [MESH] AND prognosis [MESH] AND coronary artery disease (exploded)
- ((imaging, magnetic resonance[MeSH Terms]) AND prognosis[MeSH Terms]) AND coronary artery disease (exploded term).
- ((exercise test[MeSH Terms]) AND electrocardiography[MeSH Terms]) AND prognosis [MeSH Terms] AND coronary artery disease
- ((bicycle ergometry test[MeSH Terms]) AND electrocardiography[MeSH Terms]) AND prognosis [MeSH Terms] AND coronary artery disease
- ((positron emission tomography[MeSH Terms]) AND prognosis[MeSH Terms]) AND coronary artery disease
- ((single photon emission tomography[MeSH Terms]) AND prognosis[MeSH Terms]) AND coronary artery disease
- ((stress echocardiography[MeSH Terms]) AND prognosis[MeSH Terms]) AND coronary artery disease
- (prognosis [MeSH Terms] AND coronary artery disease AND stress echocardiography)

## Appendix B

### MOOSE Guidelines for Meta-Analyses and Systematic Reviews of Observational Studies\*

|                        |                                                                                                                                                                                                                                                                                                                                                                                                                                                                                                                                                                                                                                                                                                                                                                                                                                                                                                                                                                                                                                          |
|------------------------|------------------------------------------------------------------------------------------------------------------------------------------------------------------------------------------------------------------------------------------------------------------------------------------------------------------------------------------------------------------------------------------------------------------------------------------------------------------------------------------------------------------------------------------------------------------------------------------------------------------------------------------------------------------------------------------------------------------------------------------------------------------------------------------------------------------------------------------------------------------------------------------------------------------------------------------------------------------------------------------------------------------------------------------|
| <b>Title</b>           | Identify the study as a meta-analysis (or systematic review)                                                                                                                                                                                                                                                                                                                                                                                                                                                                                                                                                                                                                                                                                                                                                                                                                                                                                                                                                                             |
| <b>Abstract</b>        | Use the journal's structured format                                                                                                                                                                                                                                                                                                                                                                                                                                                                                                                                                                                                                                                                                                                                                                                                                                                                                                                                                                                                      |
| <b>Introduction</b>    | <b>Present</b> <ul style="list-style-type: none"><li>✓ • The clinical problem</li><li>✓ • The hypothesis</li><li>✓ • A statement of objectives that includes the study population, the condition of interest, the exposure or intervention, and the outcome(s) considered</li></ul>                                                                                                                                                                                                                                                                                                                                                                                                                                                                                                                                                                                                                                                                                                                                                      |
| <b>Sources</b>         | <b>Describe</b> <ul style="list-style-type: none"><li>✓ • Qualifications of searchers (eg, librarians and investigators)</li><li>✓ • Search strategy, including time period included in the synthesis and keywords</li><li>✓ • Effort to include all available studies, <del>including contact with authors</del></li><li>✓ • Databases and registries searched</li><li>✓ • Search software used, name and version, including special features used (eg, explosion)</li><li>✓ • Use of hand searching (eg, reference lists of obtained articles)</li><li>✓ • List of citations located and those excluded, including justification</li><li>✓ • Method of addressing articles published in languages other than English</li><li>✓ • Method of handling abstracts and unpublished studies</li><li>✓ • Description of any contact with authors</li></ul>                                                                                                                                                                                    |
| <b>Study Selection</b> | <b>Describe</b> <ul style="list-style-type: none"><li>✓ • Types of study designs considered</li><li>✓ • Relevance or appropriateness of studies gathered for assessing the hypothesis to be tested</li><li>✓ • Rationale for the selection and coding of data (eg, sound clinical principles or convenience)</li><li>✓ • Documentation of how data were classified and coded (eg, multiple raters, blinding, and interrater reliability)</li><li>✓ • Assessment of confounding (eg, comparability of cases and controls in studies where appropriate)</li><li>✓ • Assessment of study quality, including blinding of quality assessors; stratification or regression on possible predictors of study results</li><li>✓ • Assessment of heterogeneity</li><li>✓ • Statistical methods (eg, complete description of fixed or random effects models, justification of whether the chosen models account for predictors of study results, dose-response models, or cumulative meta-analysis) in sufficient detail to be replicated</li></ul> |
| <b>Results</b>         | <b>Present</b> <ul style="list-style-type: none"><li>✓ • A graph summarizing individual study estimates and the overall estimate</li><li>✓ • A table giving descriptive information for each included study</li><li>✓ • Results of sensitivity testing (eg, subgroup analysis)</li><li>✓ • Indication of statistical uncertainty of findings</li></ul>                                                                                                                                                                                                                                                                                                                                                                                                                                                                                                                                                                                                                                                                                   |
| <b>Discussion</b>      | <b>Discuss</b> <ul style="list-style-type: none"><li>✓ • Strengths and weaknesses</li><li>✓ • Potential biases in the review process (eg, publication bias)</li><li>✓ • Justification for exclusion (eg, exclusion of non-English-language citations)</li><li>✓ • Assessment of quality of included studies</li><li>✓ • Consideration of alternative explanations for observed results</li><li>✓ • Generalization of the conclusions (ie, appropriate for the data presented and within the domain of the literature review)</li><li>✓ • Guidelines for future research</li><li>✓ • Disclosure of funding source</li></ul>                                                                                                                                                                                                                                                                                                                                                                                                               |

\*Modified from Stroup DF, Berlin JA, Morton SC, Olkin I, Williamson GD, Rennie D, et al. Meta-analysis of observational studies in epidemiology: a proposal for reporting. Meta-analysis Of Observational Studies in Epidemiology (MOOSE) group. JAMA 2000;283:2008–12. Copyrighted © 2000, American Medical Association. All rights reserved.

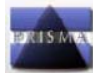

## PRISMA 2009 Checklist

| Section/topic                      | #  | Checklist item                                                                                                                                                                                                                                                                                              | Reported on page # |
|------------------------------------|----|-------------------------------------------------------------------------------------------------------------------------------------------------------------------------------------------------------------------------------------------------------------------------------------------------------------|--------------------|
| <b>TITLE</b>                       |    |                                                                                                                                                                                                                                                                                                             |                    |
| Title                              | 1  | Identify the report as a systematic review, meta-analysis, or both.                                                                                                                                                                                                                                         | 1                  |
| <b>ABSTRACT</b>                    |    |                                                                                                                                                                                                                                                                                                             |                    |
| Structured summary                 | 2  | Provide a structured summary including, as applicable: background; objectives; data sources; study eligibility criteria, participants, and interventions; study appraisal and synthesis methods; results; limitations; conclusions and implications of key findings; systematic review registration number. | 2,3                |
| <b>INTRODUCTION</b>                |    |                                                                                                                                                                                                                                                                                                             |                    |
| Rationale                          | 3  | Describe the rationale for the review in the context of what is already known.                                                                                                                                                                                                                              | 5                  |
| Objectives                         | 4  | Provide an explicit statement of questions being addressed with reference to participants, interventions, comparisons, outcomes, and study design (PICOS).                                                                                                                                                  | 5                  |
| <b>METHODS</b>                     |    |                                                                                                                                                                                                                                                                                                             |                    |
| Protocol and registration          | 5  | Indicate if a review protocol exists, if and where it can be accessed (e.g., Web address), and, if available, provide registration information including registration number.                                                                                                                               | With the editor    |
| Eligibility criteria               | 6  | Specify study characteristics (e.g., PICOS, length of follow-up) and report characteristics (e.g., years considered, language, publication status) used as criteria for eligibility, giving rationale.                                                                                                      | 6,7                |
| Information sources                | 7  | Describe all information sources (e.g., databases with dates of coverage, contact with study authors to identify additional studies) in the search and date last searched.                                                                                                                                  | 6,7                |
| Search                             | 8  | Present full electronic search strategy for at least one database, including any limits used, such that it could be repeated.                                                                                                                                                                               | 6, Appendix 1      |
| Study selection                    | 9  | State the process for selecting studies (i.e., screening, eligibility, included in systematic review, and, if applicable, included in the meta-analysis).                                                                                                                                                   | 6,7, Fig. 1        |
| Data collection process            | 10 | Describe method of data extraction from reports (e.g., piloted forms, independently, in duplicate) and any processes for obtaining and confirming data from investigators.                                                                                                                                  | 8,9                |
| Data items                         | 11 | List and define all variables for which data were sought (e.g., PICOS, funding sources) and any assumptions and simplifications made.                                                                                                                                                                       | 8,9                |
| Risk of bias in individual studies | 12 | Describe methods used for assessing risk of bias of individual studies (including specification of whether this was done at the study or outcome level), and how this information is to be used in any data synthesis.                                                                                      | 8,9                |
| Summary measures                   | 13 | State the principal summary measures (e.g., risk ratio, difference in means).                                                                                                                                                                                                                               | 8,9                |
| Synthesis of results               | 14 | Describe the methods of handling data and combining results of studies, if done, including measures of consistency (e.g., $I^2$ ) for each meta-analysis.                                                                                                                                                   | 9                  |

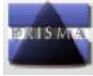

# PRISMA 2009 Checklist

| Section/topic                 | #  | Checklist item                                                                                                                                                                                           | Reported on page #       |
|-------------------------------|----|----------------------------------------------------------------------------------------------------------------------------------------------------------------------------------------------------------|--------------------------|
| Risk of bias across studies   | 15 | Specify any assessment of risk of bias that may affect the cumulative evidence (e.g., publication bias, selective reporting within studies).                                                             | 8,9                      |
| Additional analyses           | 16 | Describe methods of additional analyses (e.g., sensitivity or subgroup analyses, meta-regression), if done, indicating which were pre-specified.                                                         | 8,9                      |
| <b>RESULTS</b>                |    |                                                                                                                                                                                                          |                          |
| Study selection               | 17 | Give numbers of studies screened, assessed for eligibility, and included in the review, with reasons for exclusions at each stage, ideally with a flow diagram.                                          | 9, Fig 1                 |
| Study characteristics         | 18 | For each study, present characteristics for which data were extracted (e.g., study size, PICOS, follow-up period) and provide the citations.                                                             | Appendix E               |
| Risk of bias within studies   | 19 | Present data on risk of bias of each study and, if available, any outcome level assessment (see item 12).                                                                                                | Appendix E               |
| Results of individual studies | 20 | For all outcomes considered (benefits or harms), present, for each study: (a) simple summary data for each intervention group (b) effect estimates and confidence intervals, ideally with a forest plot. | Appendix E<br>Appendix F |
| Synthesis of results          | 21 | Present results of each meta-analysis done, including confidence intervals and measures of consistency.                                                                                                  | Fig 2-3, Appendix F-G    |
| Risk of bias across studies   | 22 | Present results of any assessment of risk of bias across studies (see Item 15).                                                                                                                          | Fig 2-3, Appendix F-G    |
| Additional analysis           | 23 | Give results of additional analyses, if done (e.g., sensitivity or subgroup analyses, meta-regression [see Item 16]).                                                                                    | Fig 2-3, Appendix F-G    |
| <b>DISCUSSION</b>             |    |                                                                                                                                                                                                          |                          |
| Summary of evidence           | 24 | Summarize the main findings including the strength of evidence for each main outcome; consider their relevance to key groups (e.g., healthcare providers, users, and policy makers).                     | 11-14                    |
| Limitations                   | 25 | Discuss limitations at study and outcome level (e.g., risk of bias), and at review-level (e.g., incomplete retrieval of identified research, reporting bias).                                            | 11-14                    |
| Conclusions                   | 26 | Provide a general interpretation of the results in the context of other evidence, and implications for future research.                                                                                  | 11-14                    |
| <b>FUNDING</b>                |    |                                                                                                                                                                                                          |                          |
| Funding                       | 27 | Describe sources of funding for the systematic review and other support (e.g., supply of data); role of funders for the systematic review.                                                               | 15                       |

From: Moher D, Liberati A, Tetzlaff J, Altman DG, The PRISMA Group (2009). Preferred Reporting Items for Systematic Reviews and Meta-Analyses: The PRISMA Statement. PLoS Med 6(6): e1000097. doi:10.1371/journal.pmed1000097

For more information, visit: [www.prisma-statement.org](http://www.prisma-statement.org).

## Appendix D: Study Quality

| CCTA        | Representative | Patient characteristics | Outcome | Confirmation outcome | Follow up time | Follow up completeness | Total |
|-------------|----------------|-------------------------|---------|----------------------|----------------|------------------------|-------|
| Abidov      | 1              | 1                       | 1       | 1                    | 1              | 1                      | 6     |
| Aggarwal    | 0              | 0                       | 1       | 1                    | 1              | 0                      | 3     |
| Aldrovandi  | 1              | 1                       | 1       | 1                    | 1              | 0                      | 5     |
| Andreini    | 1              | 1                       | 1       | 1                    | 1              | 1                      | 6     |
| Carrigan    | 1              | 1                       | 1       | 1                    | 1              | 0                      | 5     |
| Chen        | 1              | 0                       | 1       | 1                    | 1              | 1                      | 5     |
| Cho         | 1              | 1                       | 1       | 1                    | 1              | 0                      | 5     |
| Chong       | 0              | 0                       | 1       | 1                    | 1              | 0                      | 3     |
| Chow        | 1              | 0                       | 1       | 1                    | 1              | 1                      | 5     |
| Christiaens | 0              | 0                       | 1       | 0                    | 0              | 1                      | 2     |
| Danciu      | 1              | 0                       | 1       | 1                    | 1              | 1                      | 5     |
| Dedic       | 1              | 1                       | 1       | 1                    | 1              | 0                      | 5     |
| Gilard      | 1              | 1                       | 1       | 0                    | 1              | 1                      | 5     |
| Gopal       | 1              | 1                       | 1       | 1                    | 1              | 0                      | 5     |
| Grutta, la  | 1              | 1                       | 1       | 1                    | 1              | 0                      | 5     |
| Hadamitzky  | 1              | 1                       | 1       | 1                    | 1              | 1                      | 6     |
| Hansen      | 0              | 1                       | 1       | 1                    | 1              | 1                      | 5     |
| Hay         | 1              | 0                       | 1       | 1                    | 1              | 0                      | 4     |
| Hollander   | 0              | 0                       | 1       | 1                    | 1              | 1                      | 4     |
| Ko          | 1              | 0                       | 1       | 1                    | 1              | 1                      | 5     |
| Lingen      | 1              | 0                       | 1       | 1                    | 1              | 0                      | 4     |
| Min         | 1              | 0                       | 1       | 1                    | 1              | 0                      | 4     |
| Miszalski   | 1              | 0                       | 1       | 1                    | 1              | 1                      | 5     |
| Nasis       | 0              | 1                       | 1       | 0                    | 1              | 1                      | 4     |
| Noda        | 0              | 0                       | 1       | 0                    | 0              | 0                      | 1     |
| Øvrehus     | 1              | 1                       | 1       | 1                    | 1              | 1                      | 6     |
| Rubinshtein | 0              | 1                       | 1       | 1                    | 1              | 0                      | 4     |
| Schmermund  | 1              | 1                       | 1       | 1                    | 1              | 1                      | 6     |

|                     |                       |                                |                |                             |                       |                               |              |
|---------------------|-----------------------|--------------------------------|----------------|-----------------------------|-----------------------|-------------------------------|--------------|
| <b>Yamamoto</b>     | 1                     | 1                              | 1              | 1                           | 1                     | 0                             | 5            |
| <b>Yiu</b>          | 1                     | 1                              | 1              | 1                           | 1                     | 0                             | 5            |
| <b>CMR-perf</b>     |                       |                                |                |                             |                       |                               |              |
|                     | <b>Representative</b> | <b>Patient characteristics</b> | <b>Outcome</b> | <b>Confirmation outcome</b> | <b>Follow up time</b> | <b>Follow up completeness</b> | <b>Total</b> |
| <b>Bertaso</b>      | 1                     | 0                              | 1              | 1                           | 1                     | 0                             | 4            |
| <b>Bingham</b>      | 1                     | 1                              | 1              | 1                           | 1                     | 1                             | 6            |
| <b>Bodi</b>         | 1                     | 0                              | 1              | 1                           | 1                     | 0                             | 4            |
| <b>Chen</b>         | 1                     | 0                              | 1              | 1                           | 1                     | 1                             | 5            |
| <b>Coelho-Filho</b> | 1                     | 0                              | 1              | 1                           | 1                     | 1                             | 5            |
| <b>Doesch</b>       | 1                     | 1                              | 1              | 1                           | 1                     | 1                             | 6            |
| <b>Freed</b>        | 1                     | 0                              | 1              | 1                           | 1                     | 0                             | 4            |
| <b>Hartlage</b>     | 0                     | 1                              | 1              | 1                           | 0                     | 0                             | 3            |
| <b>Ingkanisorn</b>  | 0                     | 1                              | 1              | 0                           | 1                     | 1                             | 4            |
| <b>Lo</b>           | 1                     | 1                              | 1              | 1                           | 1                     | 0                             | 5            |
| <b>Lubbers</b>      | 1                     | 0                              | 1              | 1                           | 1                     | 1                             | 5            |
| <b>Macwar</b>       | 1                     | 0                              | 1              | 1                           | 1                     | 0                             | 4            |
| <b>Pilz</b>         | 1                     | 1                              | 1              | 0                           | 1                     | 1                             | 5            |
| <b>CMR-wm</b>       |                       |                                |                |                             |                       |                               |              |
|                     | <b>Representative</b> | <b>Patient characteristics</b> | <b>Outcome</b> | <b>Confirmation outcome</b> | <b>Follow up time</b> | <b>Follow up completeness</b> | <b>Total</b> |
| <b>Bodi</b>         | 1                     | 0                              | 1              | 1                           | 1                     | 0                             | 4            |
| <b>Gebker</b>       | 1                     | 1                              | 1              | 1                           | 1                     | 1                             | 6            |
| <b>Kelle</b>        | 1                     | 1                              | 1              | 1                           | 1                     | 1                             | 6            |
| <b>Korosoglou</b>   | 1                     | 0                              | 1              | 1                           | 1                     | 1                             | 5            |
| <b>Kuijpers</b>     | 1                     | 1                              | 1              | 1                           | 1                     | 1                             | 6            |
| <b>Wallace</b>      | 1                     | 0                              | 1              | 1                           | 1                     | 1                             | 5            |
| <b>EET</b>          |                       |                                |                |                             |                       |                               |              |
|                     | <b>Representative</b> | <b>Patient characteristics</b> | <b>Outcome</b> | <b>Confirmation outcome</b> | <b>Follow up time</b> | <b>Follow up completeness</b> | <b>Total</b> |
| <b>Bigi</b>         | 1                     | 0                              | 1              | 1                           | 1                     | 1                             | 5            |
| <b>Bourque</b>      | 0                     | 1                              | 1              | 1                           | 1                     | 1                             | 5            |
| <b>Bouzas-</b>      | 0                     | 1                              | 1              | 1                           | 1                     | 1                             | 5            |

| <b>Mosquera</b>      |                       |                                |                |                             |                       |                               |              |
|----------------------|-----------------------|--------------------------------|----------------|-----------------------------|-----------------------|-------------------------------|--------------|
| <b>Calasans</b>      | 1                     | 1                              | 1              | 1                           | 1                     | 0                             | 5            |
| <b>Cannan</b>        | 0                     | 0                              | 1              | 1                           | 1                     | 1                             | 4            |
| <b>Chatziioannou</b> | 0                     | 0                              | 1              | 1                           | 1                     | 0                             | 3            |
| <b>Cho</b>           | 1                     | 1                              | 1              | 1                           | 1                     | 0                             | 5            |
| <b>Coletta</b>       | 1                     | 0                              | 1              | 1                           | 1                     | 1                             | 5            |
| <b>Dedic</b>         | 1                     | 1                              | 1              | 1                           | 1                     | 0                             | 5            |
| <b>Houghton</b>      | 1                     | 0                              | 1              | 0                           | 1                     | 1                             | 4            |
| <b>Jeetley</b>       | 0                     | 1                              | 1              | 1                           | 0                     | 1                             | 4            |
| <b>Lichtlen</b>      | 1                     | 0                              | 1              | 0                           | 1                     | 0                             | 3            |
| <b>Marshall</b>      | 0                     | 1                              | 1              | 1                           | 1                     | 1                             | 5            |
| <b>Mulcahy</b>       | 1                     | 1                              | 1              | 1                           | 1                     | 1                             | 6            |
| <b>Niemann</b>       | 1                     | 0                              | 1              | 1                           | 1                     | 0                             | 4            |
| <b>Pontone</b>       | 1                     | 1                              | 1              | 1                           | 1                     | 0                             | 5            |
| <b>Raiker</b>        | 0                     | 0                              | 1              | 1                           | 1                     | 1                             | 4            |
| <b>Sanchis</b>       | 0                     | 0                              | 1              | 1                           | 0                     | 0                             | 2            |
| <b>Sawada</b>        | 0                     | 0                              | 1              | 1                           | 1                     | 0                             | 3            |
| <b>Vanzetto</b>      | 1                     | 0                              | 1              | 1                           | 1                     | 1                             | 5            |
| <b>Zanco</b>         | 1                     | 0                              | 1              | 1                           | 1                     | 1                             | 5            |
|                      |                       |                                |                |                             |                       |                               |              |
| <b>PET</b>           | <b>Representative</b> | <b>Patient characteristics</b> | <b>Outcome</b> | <b>Confirmation outcome</b> | <b>Follow up time</b> | <b>Follow up completeness</b> | <b>Total</b> |
| <b>Chow</b>          | 1                     | 0                              | 1              | 1                           | 1                     | 0                             | 4            |
| <b>Chow</b>          | 1                     | 0                              | 1              | 1                           | 1                     | 1                             | 5            |
| <b>Dorbala</b>       | 1                     | 0                              | 1              | 1                           | 1                     | 0                             | 4            |
| <b>Tosh, van</b>     | 1                     | 1                              | 1              | 1                           | 1                     | 0                             | 5            |
|                      |                       |                                |                |                             |                       |                               |              |
| <b>SE</b>            | <b>Representative</b> | <b>Patient characteristics</b> | <b>Outcome</b> | <b>Confirmation outcome</b> | <b>Follow up time</b> | <b>Follow up completeness</b> | <b>Total</b> |
| <b>Afridi</b>        | 1                     | 1                              | 1              | 1                           | 0                     | 1                             | 5            |
| <b>Almeida</b>       | 1                     | 0                              | 1              | 1                           | 1                     | 1                             | 5            |
| <b>Anthopoulos</b>   | 1                     | 0                              | 1              | 1                           | 1                     | 0                             | 4            |



|                             |   |   |   |   |   |   |   |
|-----------------------------|---|---|---|---|---|---|---|
| <b>Baldini</b>              | 1 | 0 | 1 | 1 | 0 | 0 | 3 |
| <b>Bholasingh</b>           | 1 | 0 | 1 | 1 | 0 | 1 | 4 |
| <b>Biagini</b>              | 1 | 0 | 1 | 1 | 1 | 1 | 5 |
| <b>Bouzas-<br/>Mosquera</b> | 0 | 1 | 1 | 1 | 1 | 0 | 4 |
| <b>Calasans</b>             | 0 | 1 | 1 | 1 | 1 | 0 | 4 |
| <b>Chuah</b>                | 1 | 1 | 1 | 1 | 1 | 1 | 6 |
| <b>Chung</b>                | 1 | 1 | 1 | 1 | 1 | 1 | 6 |
| <b>Ciaroni</b>              | 1 | 1 | 1 | 1 | 1 | 1 | 6 |
| <b>Coletta</b>              | 1 | 0 | 1 | 1 | 1 | 0 | 4 |
| <b>Colon</b>                | 0 | 0 | 1 | 1 | 1 | 1 | 4 |
| <b>Cordovil</b>             | 1 | 1 | 1 | 1 | 1 | 1 | 6 |
| <b>Cortigiani</b>           | 1 | 0 | 1 | 1 | 1 | 1 | 5 |
| <b>Davar</b>                | 1 | 0 | 1 | 1 | 1 | 1 | 5 |
| <b>Hartlage</b>             | 0 | 0 | 1 | 1 | 0 | 1 | 3 |
| <b>Isma'eel</b>             | 1 | 0 | 1 | 1 | 1 | 1 | 5 |
| <b>Ismail</b>               | 1 | 0 | 1 | 1 | 1 | 1 | 5 |
| <b>Kamaran</b>              | 1 | 0 | 1 | 1 | 0 | 1 | 4 |
| <b>Krivokapich</b>          | 1 | 0 | 1 | 1 | 1 | 1 | 5 |
| <b>Krivokapich</b>          | 1 | 0 | 1 | 1 | 1 | 1 | 5 |
| <b>Low</b>                  | 1 | 1 | 1 | 1 | 1 | 1 | 6 |
| <b>Marcovitz</b>            | 1 | 0 | 1 | 1 | 1 | 1 | 5 |
| <b>Marwick</b>              | 0 | 0 | 1 | 1 | 1 | 1 | 4 |
| <b>Mesa</b>                 | 1 | 1 | 1 | 1 | 1 | 1 | 6 |
| <b>Olmos</b>                | 1 | 0 | 1 | 1 | 1 | 1 | 5 |
| <b>Pingitore</b>            | 1 | 0 | 1 | 1 | 1 | 1 | 5 |
| <b>Sawada</b>               | 1 | 0 | 1 | 1 | 1 | 0 | 4 |
| <b>Sawada</b>               | 1 | 0 | 1 | 1 | 1 | 1 | 5 |
| <b>Song</b>                 | 1 | 0 | 1 | 1 | 1 | 1 | 5 |
| <b>Srivastava</b>           | 1 | 1 | 1 | 1 | 1 | 1 | 6 |
| <b>Steinberg</b>            | 1 | 0 | 1 | 1 | 1 | 1 | 5 |
| <b>Yao</b>                  | 1 | 0 | 1 | 1 | 1 | 1 | 5 |

|                      |                       |                                |                |                             |                       |                               |              |
|----------------------|-----------------------|--------------------------------|----------------|-----------------------------|-----------------------|-------------------------------|--------------|
| <b>Yao</b>           | 1                     | 0                              | 1              | 1                           | 1                     | 1                             | 5            |
| <b>Zagatina</b>      | 1                     | 0                              | 1              | 1                           | 1                     | 0                             | 4            |
| <b>SPECT</b>         | <b>Representative</b> | <b>Patient characteristics</b> | <b>Outcome</b> | <b>Confirmation outcome</b> | <b>Follow up time</b> | <b>Follow up completeness</b> | <b>Total</b> |
| <b>Acampa</b>        | 1                     | 0                              | 1              | 1                           | 1                     | 1                             | 5            |
| <b>Akinboboye</b>    | 1                     | 0                              | 1              | 1                           | 1                     | 0                             | 4            |
| <b>Basic</b>         | 1                     | 0                              | 1              | 1                           | 1                     | 1                             | 5            |
| <b>Bom</b>           | 1                     | 1                              | 1              | 1                           | 1                     | 0                             | 5            |
| <b>Boyne</b>         | 1                     | 0                              | 1              | 1                           | 1                     | 0                             | 4            |
| <b>Bucerius</b>      | 1                     | 1                              | 1              | 1                           | 1                     | 1                             | 6            |
| <b>Calnon</b>        | 1                     | 0                              | 1              | 1                           | 1                     | 1                             | 5            |
| <b>Chatziioannou</b> | 0                     | 1                              | 1              | 1                           | 1                     | 0                             | 4            |
| <b>Dawson</b>        | 1                     | 0                              | 1              | 1                           | 1                     | 0                             | 4            |
| <b>Dona</b>          | 1                     | 0                              | 1              | 1                           | 1                     | 1                             | 5            |
| <b>Doukky</b>        | 1                     | 1                              | 1              | 1                           | 1                     | 1                             | 6            |
| <b>Ferreira</b>      | 1                     | 0                              | 1              | 1                           | 1                     | 1                             | 5            |
| <b>Filipiak</b>      | 1                     | 0                              | 1              | 1                           | 1                     | 1                             | 5            |
| <b>Galassi</b>       | 1                     | 0                              | 1              | 1                           | 1                     | 0                             | 4            |
| <b>Gentile</b>       | 1                     | 0                              | 1              | 1                           | 1                     | 1                             | 5            |
| <b>Gibbons</b>       | 0                     | 0                              | 1              | 1                           | 1                     | 1                             | 4            |
| <b>Gibson</b>        | 1                     | 1                              | 1              | 1                           | 1                     | 0                             | 5            |
| <b>Groutars</b>      | 1                     | 0                              | 1              | 1                           | 1                     | 1                             | 5            |
| <b>Hachamovitch</b>  | 1                     | 0                              | 1              | 1                           | 1                     | 1                             | 5            |
| <b>Hage</b>          | 0                     | 0                              | 1              | 1                           | 1                     | 0                             | 3            |
| <b>Hakeem</b>        | 1                     | 1                              | 1              | 1                           | 1                     | 0                             | 5            |
| <b>Iqbal</b>         | 1                     | 1                              | 1              | 1                           | 1                     | 1                             | 6            |
| <b>Jeong</b>         | 0                     | 1                              | 1              | 1                           | 1                     | 0                             | 4            |
| <b>Kaminek</b>       | 1                     | 0                              | 1              | 0                           | 1                     | 0                             | 3            |
| <b>Klodos</b>        | 0                     | 0                              | 1              | 1                           | 1                     | 0                             | 3            |
| <b>Koehli</b>        | 1                     | 0                              | 1              | 1                           | 1                     | 1                             | 5            |
| <b>Leslie</b>        | 1                     | 0                              | 1              | 1                           | 1                     | 0                             | 4            |

|                     |   |   |   |   |   |   |   |
|---------------------|---|---|---|---|---|---|---|
| <b>Lima</b>         | 1 | 1 | 1 | 1 | 1 | 1 | 6 |
| <b>Miernik</b>      | 0 | 0 | 1 | 0 | 1 | 1 | 3 |
| <b>Mouden</b>       | 0 | 1 | 1 | 1 | 1 | 1 | 5 |
| <b>Nabi</b>         | 0 | 0 | 1 | 1 | 0 | 1 | 3 |
| <b>Nishimura</b>    | 1 | 0 | 1 | 1 | 1 | 1 | 5 |
| <b>Olmos</b>        | 1 | 0 | 1 | 1 | 1 | 1 | 5 |
| <b>Otsuka</b>       | 1 | 0 | 1 | 0 | 1 | 1 | 4 |
| <b>Pazhenkottil</b> | 1 | 0 | 1 | 1 | 1 | 0 | 4 |
| <b>Petix</b>        | 1 | 0 | 1 | 1 | 1 | 1 | 5 |
| <b>Raziei</b>       | 1 | 0 | 1 | 1 | 1 | 0 | 4 |
| <b>Romero</b>       | 1 | 0 | 1 | 1 | 1 | 0 | 4 |
| <b>Schinkel</b>     | 1 | 0 | 1 | 1 | 1 | 1 | 5 |
| <b>Schinkel</b>     | 1 | 0 | 1 | 1 | 1 | 1 | 5 |
| <b>Sharma</b>       | 0 | 1 | 1 | 1 | 1 | 1 | 5 |
| <b>Shimoni</b>      | 0 | 0 | 1 | 1 | 1 | 1 | 4 |
| <b>Simonsen</b>     | 1 | 1 | 1 | 1 | 1 | 1 | 6 |
| <b>Soman</b>        | 1 | 0 | 1 | 1 | 1 | 1 | 5 |
| <b>Stratmann</b>    | 1 | 0 | 1 | 1 | 1 | 1 | 5 |
| <b>Stratmann</b>    | 1 | 1 | 1 | 1 | 1 | 1 | 6 |
| <b>Sugihara</b>     | 1 | 0 | 1 | 0 | 1 | 1 | 4 |
| <b>Travin</b>       | 1 | 0 | 1 | 1 | 1 | 1 | 5 |
| <b>Travin</b>       | 1 | 1 | 1 | 1 | 1 | 1 | 6 |
| <b>Uebleis</b>      | 1 | 1 | 1 | 1 | 1 | 1 | 6 |
| <b>Uthamalingam</b> | 0 | 1 | 1 | 1 | 1 | 1 | 5 |
| <b>Vanzetto</b>     | 1 | 0 | 1 | 1 | 1 | 1 | 5 |
| <b>Wolak</b>        | 1 | 1 | 1 | 1 | 1 | 0 | 5 |
| <b>Yang</b>         | 1 | 1 | 1 | 1 | 1 | 1 | 6 |
| <b>Zanco</b>        | 1 | 0 | 1 | 0 | 1 | 1 | 4 |

## Appendix E

**eTable 1a. Coronary Computed Tomographic Angiography (CCTA) – patient and study characteristics**

| Author (ref. #)   | Year | Design | Selection              | N    | Lost to follow-up, N (%) | Mean age, y (SD) | Male, N (%) | History of CAD, N (%) | History of MI, N (%) | History of revasc, N (%) | Scanner       | Definition neg. test | Quality assessment |
|-------------------|------|--------|------------------------|------|--------------------------|------------------|-------------|-----------------------|----------------------|--------------------------|---------------|----------------------|--------------------|
| Abidov(1)         | 2009 | PS     | Suspected CAD          | 199  | 1 (0.5)                  | 54 (NS)          | 107 (54)    | 0 (0)                 | 0 (0)                | 0 (0)                    | 64-slice      | <50% stenosis        | 6                  |
| Aggarwal(2) §     | 2011 | PS     | Suspected or known CAD | 111  | 13 (10)                  | 51 (NS)          | 47 (42)     | NS                    | NS                   | NS                       | 16-slice      | <50% stenosis        | 3                  |
| Aldrovandi(3)     | 2012 | RS     | Suspected or known CAD | 767  | NS                       | 62 (11)          | 496 (65)    | 217 (28)              | 151 (20)             | 172 (22)                 | 64-slice      | <50% stenosis        | 5                  |
| Andreini(4)       | 2012 | PS     | Suspected CAD          | 1196 | 38 (3)                   | 62 (11)          | 782 (62)    | 0 (0)                 | 0 (0)                | 0 (0)                    | 64-slice      | <50% stenosis        | 6                  |
| Carrigan(5)       | 2009 | RS     | Suspected CAD          | 227  | NS                       | 54 (12)          | 139 (61)    | 0 (0)                 | 0 (0)                | 0 (0)                    | 64-slice      | <50% stenosis        | 5                  |
| Chen(6)           | 2014 | PS     | Suspected or known CAD | 151  | 0 (0)                    | 56 (48-63)       | 91 (60)     | 17 (11)               | NS                   | 17 (11)                  | 320-row       | <50% stenosis        | 5                  |
| Cho(7)            | 2012 | RS     | Suspected CAD          | 2977 | NS                       | 58 (10)          | 1476 (50)   | 0 (0)                 | 0 (0)                | 0 (0)                    | 64-slice      | <50% stenosis        | 5                  |
| Chong(8) §        | 2012 | RS     | NS                     | 70   | NS                       | 52 (NS)          | 40 (57)     | NS                    | NS                   | NS                       | 16/64-slice   | <50% stenosis        | 3                  |
| Chow(9)           | 2010 | PS     | NS                     | 2076 | 96 (4)                   | 58 (12)          | 1087 (52)   | NS                    | NS                   | 0 (0)                    | 64-slice      | <50% stenosis        | 5                  |
| Christiaens(10) § | 2012 | PS     | Suspected or known CAD | 175  | 0 (0)                    | 60 (8)           | 124 (71)    | NS                    | 2 (1)                | 12 (7)                   | 64-slice      | <50% stenosis        | 2                  |
| Danciu(11)        | 2007 | PS     | Suspected or known CAD | 421  | 0 (0)                    | 64 (12)          | 266 (63)    | 145 (34)              | NS                   | NS                       | 64-slice      | <50% stenosis        | 5                  |
| Dedic(12)         | 2011 | PS     | Suspected CAD          | 409  | 47 (10)                  | 58 (NS)          | 217 (53)    | 0 (0)                 | 0 (0)                | 0 (0)                    | 64-slice      | <50% stenosis        | 5                  |
| Gilard(13)        | 2007 | PS     | Suspected CAD          | 141  | 0 (0)                    | 59 (12)          | 88 (62)     | 0 (0)                 | 0 (0)                | 0 (0)                    | 16-slice      | <50% stenosis        | 5                  |
| Gopal(14)         | 2009 | PS     | Suspected CAD          | 493  | NS                       | 58 (15)          | 347 (70)    | 0 (0)                 | 0 (0)                | 0 (0)                    | 64-slice      | <50% stenosis        | 5                  |
| Grutta, Ia(15)    | 2011 | PS     | Suspected CAD          | 125  | NS                       | 57 (10)          | 82 (66)     | 0 (0)                 | 0 (0)                | 0 (0)                    | 64-slice      | <50% stenosis        | 5                  |
| Hadamitzky(16)    | 2013 | RS     | Suspected CAD          | 1584 | 36 (2)                   | 58 (11)          | 1091 (69)   | 0 (0)                 | 0 (0)                | 0 (0)                    | 16 / 64-slice | <50% stenosis        | 6                  |
| Hansen(17) §      | 2010 | PS     | Suspected CAD          | 89   | 0 (0)                    | 56 (9)           | 56 (63)     | 0 (0)                 | 0 (0)                | 0 (0)                    | 64-slice      | <50% stenosis        | 5                  |
| Hay(18)           | 2010 | RS     | Suspected CAD          | 138  | NS                       | 57 (NS)          | 73 (53)     | 0 (0)                 | 0 (0)                | 0 (0)                    | 64-slice      | <50% stenosis        | 4                  |
| Hollander(19) §   | 2009 | PS     | Suspected or known CAD | 481  | 0 (0)                    | 46 (9)           | 193 (40)    | NS                    | 2 (0.2)              | NS                       | 64-slice      | <50% stenosis        | 4                  |
| Ko(20)            | 2014 | RS     | Suspected or known CAD | 115  | 1 (1)                    | 64 (10)          | 76 (66)     | 48 (42)               | 11 (10)              | NS                       | 320-row       | <50% stenosis        | 5                  |
| Lingen, van(21)   | 2008 | RS     | Suspected or known CAD | 178  | NS                       | 56 (NS)          | 76 (43)     | NS                    | NS                   | NS                       | 16-slice      | <50% stenosis        | 4                  |

| Author (ref. #)     | Year | Design | Selection              | N    | Lost to follow-up, N (%) | Mean age, y (SD) | Male, N (%) | History of CAD, N (%) | History of MI, N (%) | History of revasc, N (%) | Scanner             | Definition    | Quality assessment |
|---------------------|------|--------|------------------------|------|--------------------------|------------------|-------------|-----------------------|----------------------|--------------------------|---------------------|---------------|--------------------|
| Min(22)             | 2010 | PS     | Suspected or known CAD | 172  | NS                       | 63 (12)          | 98 (57)     | 42 (24)               | NS                   | NS                       | 64-slice            | <50% stenosis | 4                  |
| Miszalski-Jamka(23) | 2012 | NS     | Suspected CAD          | 494  | 10 (2)                   | 58 (10)          | 259 (52)    | 0 (0)                 | 0 (0)                | 0 (0)                    | 16 / 64-slice       | <50% stenosis | 5                  |
| Nasis(24) §         | 2011 | PS     | Suspected CAD          | 203  | 0 (0)                    | 55 (11)          | 123 (60)    | 0 (0)                 | 0 (0)                | 0 (0)                    | 320-row             | <50% stenosis | 4                  |
| Noda(25) §          | 2008 | PS     | Suspected CAD          | 26   | NS                       | 65 (NS)&         | 12 (43)&    | 0 (0)                 | 0 (0)                | 0 (0)                    | 16-slice            | <50% stenosis | 1                  |
| Øvrehus(26)         | 2011 | PS     | Suspected CAD          | 1055 | 0 (0)                    | 55 (NS)          | 464 (44)    | 0 (0)                 | 0 (0)                | 0 (0)                    | 64-slice            | <50% stenosis | 6                  |
| Rubinshtein(27) §   | 2013 | PS     | Suspected CAD          | 334  | NS                       | 57 (13)          | 189 (57)    | 0 (0)                 | 0 (0)                | 0 (0)                    | 64-slice            | <50% stenosis | 4                  |
| Schmermund(28)      | 2010 | RS     | Suspected CAD          | 670  | 36 (5)                   | 59 (11)          | 409 (58)    | 0 (0)                 | 0 (0)                | 0 (0)                    | 64-slice            | <50% stenosis | 6                  |
| Yamamoto(29)        | 2013 | NS     | Suspected CAD          | 511  | NS                       | 66 (11)          | 325 (64)    | 0 (0)                 | 0 (0)                | 0 (0)                    | 64-slice            | <50% stenosis | 5                  |
| Yiu(30)             | 2012 | RS     | Suspected CAD          | 2432 | NS                       | 57 (12)          | 1364 (56)   | 0 (0)                 | 0 (0)                | 0 (0)                    | 64-slice<br>320-row | <50% stenosis | 5                  |

CAD=coronary artery disease, MI=myocardial infarction, N=number of patients, NS=not specified, PS=prospective, Revasc=revascularization, RS=retrospective, SD=standard deviation.

§ Specific study population.

**eTable 1b. Coronary Computed Tomographic Angiography (CCTA) – absolute number of adverse cardiovascular events**

| Author (ref. #) | Follow-up, years (SD) | N    | Negative test (i.e. <50% stenosis) |    |        |     |                             | Population event risk |                    |                             |
|-----------------|-----------------------|------|------------------------------------|----|--------|-----|-----------------------------|-----------------------|--------------------|-----------------------------|
|                 |                       |      | Death/Cardiac death                | MI | Revasc | UAP | Cardiac death + MI (AER, %) | N                     | Cardiac death + MI | Cardiac death + MI (AER, %) |
| Abidov(1)       | 2.3 (0.7)             | 163  | 0 / 0                              | 0  | 3      | NS  | 0 (0.0%)                    | 199                   | 0                  | 0.0%                        |
| Aggarwal(2)     | 2.8 (0.3)             | 92   | NS / 1                             | 0  | 0      | NS  | 1 (0.4%)                    | 111                   | 1                  | 0.3%                        |
| Aldrovandi(3)   | 1.7 (0.3)             | 501  | 2 / 1                              | 3  | 11*    | 0   | 4 (0.5%)                    | 767                   | 16                 | 1.2%                        |
| Andreini(4)     | 4.3 (1.8)             | 744  | NS / NS                            | NS | NS     | NS  | 23 (0.7%)                   | 1196                  | 125                | 2.4%                        |
| Carrigan(5)     | 2.3 (0.8)             | 172  | NS / NS                            | NS | NS     | NS  | 1 (0.3%)                    | 227                   | 4                  | 0.8%                        |
| Chen(6)         | 1.2 (0.3)             | 106  | NS / 0                             | 1  | NS     | 0   | 1 (0.8%)                    |                       |                    |                             |
| Cho(7)          | 3.3 (2.3-4.6)         | 2568 | NS / 1                             | 2  | 16     | 3   | 3 (0.0%)                    | 2977                  | 9                  | 0.1%                        |
| Chong(8)        | 4.6 (0.6)             | 70   | 1 / 0                              | 1  | 0      | NS  | 1 (0.3%)                    |                       |                    |                             |
| Chow(9)         | 1.3 (0.7)             | 1457 | 10 / 4                             | 5  | NS     | NS  | 9 (0.5%)                    | 2076                  | 34                 | 1.3%                        |
| Christiaens(10) | 0.5 (0.2)             | 136  | 0 / 0                              | 0  | 0      | NS  | 0 (0.0%)                    | 175                   | 0                  | 0.0%                        |
| Danciu(11)      | 1.3 (0.3)             | 237  | 0 / 0                              | 0  | NS     | NS  | 0 (0.0%)                    | 421                   | 2                  | 0.4%                        |
| Dedic(12)       | 2.6 (NS)              | 277  | NS / 1                             | 2  | 3      | 3   | 3 (0.4%)                    | 409                   | 10                 | 0.9%                        |
| Gilard(13)      | 1.2 (NS)              | 141  | 0 / 0                              | 1  | NS     | NS  | 1 (0.6%)                    |                       |                    |                             |
| Gopal(14)       | 3.3 (0.8)             | 361  | 0 / 0                              | 0  | 0      | NS  | 0 (0.0%)                    | 493                   | 21                 | 1.3%                        |
| Grutta, Ia(15)  | 2.0 (NS)              | 90   | NS / 0                             | 0  | 5*     | NS  | 0 (0.0%)                    | 125                   | 2                  | 0.8%                        |
| Hadamitzky(16)  | 5.5 (5.1-6.2)         | 1258 | NS / NS                            | NS | NS     | NS  | 15 (0.2%)                   | 1584                  | 25                 | 0.3%                        |
| Hansen(17)      | 1.0 (0.2)             | 74   | 0 / 0                              | 0  | 0      | NS  | 0 (0.0%)                    | 89                    | 0                  | 0.0%                        |
| Hay(18)         | 1.7 (NS-NS)           | 116  | 0 / 0                              | 0  | 0      | 0   | 0 (0.0%)                    | 138                   | 0                  | 0.0%                        |
| Hollander(19)   | 1.0 (0.0)             | 481  | 1 / 0                              | 0  | 0      | NS  | 0 (0.0%)                    |                       |                    |                             |
| Ko(20)          | 1.5 (1.1-2.3)         | 20   | 0 / 0                              | 0  | NS     | NS  | 0 (0.0%)                    | 115                   | 1                  | 0.6%                        |

| Author (ref. #)     | Follow-up, years (SD) | N    | Negative test (i.e. <50% stenosis) |    |        |     |                             | Population event risk |                    |                             |
|---------------------|-----------------------|------|------------------------------------|----|--------|-----|-----------------------------|-----------------------|--------------------|-----------------------------|
|                     |                       |      | Death/Cardiac death                | MI | Revasc | UAP | Cardiac death + MI (AER, %) | N                     | Cardiac death + MI | Cardiac death + MI (AER, %) |
| Lingen, van(21)     | 1.0 (NS)              | 178  | 0 / 0                              | 0  | 2      | 0   | 0 (0.0%)                    |                       |                    |                             |
| Min(22)             | 1.8 (0.4)             | 109  | 0 / 0                              | 1  | 0      | 1   | 1 (0.5%)                    | 172                   | 1                  | 0.3%                        |
| Miszalski-Jamka(23) | 3.6 (0.9)             | 355  | NS / NS                            | NS | 31     | NS  | 9 (0.7%)                    | 494                   | 17                 | 1.0%                        |
| Nasis(24)           | 1.2 (NS)              | 168  | 0 / 0                              | 0  | 0      | 0   | 0 (0.0%)                    | 203                   | 0                  | 0.0%                        |
| Noda(25)            | 0.8 (0.6)             | 8    | NS / 0                             | 0  | 0      | 0   | 0 (0.0%)                    | 26                    | 1                  | 4.8%                        |
| Øvrehus(26)         | 1.5 (1.2–2.1)         | 843  | 2 / 0                              | 3  | 2      | NS  | 3 (0.2%)                    | 1055                  | 7                  | 0.4%                        |
| Rubinshtein(27) §   | 6.1 (1.0)             | 334  | NS / 10                            | 3  | NS     | NS  | 13 (0.6%)                   |                       |                    |                             |
| Schmermund(28)      | 3.2 (NS)              | 705  | 9 / 0                              | 2  | 13     | NS  | 2 (0.1%)                    |                       |                    |                             |
| Yamamoto(29)        | 3.3 (1.2)             | 372  | NS / 0                             | 2  | 5      | 4   | 2 (0.2%)                    | 453                   | 9                  | 0.6%                        |
| Yiu(30)             | 2.2 (1.3–3.1)         | 1752 | NS / NS                            | NS | NS     | NS  | NS (0.5%)                   | 2432                  | 58                 | 1.1%                        |

AER=annual event rate, MI=myocardial infarction, N=number of patients, NS=not specified, Revasc=revascularization, SD=standard deviation, UAP=unstable angina pectoris.

\* Represents (possible) early revascularizations.

**eTable 2a. Cardiovascular Magnetic Resonance (CMR) perfusion – patient and study characteristics**

| Author (ref. #)          | Year | Design | Selection              | N    | Lost to follow-up, N (%) | Mean age, y (SD) | Male, N (%) | History of CAD, N (%) | History of MI, N (%) | History of revasc, N (%) | Tesla | Stressor (%)                        | Definition 'no ischemia'                         | Quality assessment |
|--------------------------|------|--------|------------------------|------|--------------------------|------------------|-------------|-----------------------|----------------------|--------------------------|-------|-------------------------------------|--------------------------------------------------|--------------------|
| <b>Bertaso(31)</b>       | 2012 | PS     | Suspected or known CAD | 362  | NS                       | 62 (12)          | 211 (58)    | 157 (43)              | NS                   | NS                       | 1.5   | Adenosine                           | Qualitative (no reversible defect)               | 4                  |
| <b>Bingham(32)</b>       | 2011 | PS     | Suspected or known CAD | 908  | 24 (3)                   | 65 (NS)          | 532 (59)    | 449 (49)              | 317 (35)             | 433 (48)                 | 1.5   | Adenosine                           | Semi-quantitative (no fixed / reversible defect) | 6                  |
| <b>Bodi(33)</b>          | 2012 | PS     | Suspected or known CAD | 1722 | NS                       | 64 (11)          | 1071 (62)   | NS                    | 389 (23)             | 363 (21)                 | 1.5   | Dipyridamole                        | Semi-quantitative (no fixed / reversible defect) | 4                  |
| <b>Chen(6)</b>           | 2014 | PS     | Suspected or known CAD | 151  | 0 (0)                    | 56 (48-63)       | 91 (60)     | 17 (11)               | NS                   | 17 (11)                  | 1.5   | Regadenoson / dipyridamole          | Qualitative (no reversible defect)               | 5                  |
| <b>Coelho-Filho(34)</b>  | 2011 | PS     | Suspected or known CAD | 405  | 0 (0)                    | 57 (14)          | 237 (59)    | NS                    | 82 (20)              | 98 (24)                  | 1.5   | Adenosine (92%) / dipyridamole (8%) | Semi-quantitative (no reversible defect)         | 5                  |
| <b>Doesch(35)</b>        | 2009 | PS     | Known CAD              | 81   | 0 (0)                    | 64 (NS)          | 67 (83)     | 81 (100)              | 24 (30)              | 28 (35)                  | 1.5   | Adenosine                           | Qualitative (no reversible defect)               | 6                  |
| <b>Freed(36)</b>         | 2013 | PS     | Suspected or known CAD | 149  | 16 (10)                  | 56 (15)          | 83 (56)     | 45 (30)               | NS                   | NS                       | 1.5   | Regadenoson                         | Qualitative (no reversible defect)               | 4                  |
| <b>Hartlage(37) §</b>    | 2011 | RS     | Suspected CAD          | 89   | NS                       | 56 (12)          | 29 (33)     | 0 (0)                 | 0 (0)                | 0 (0)                    | 1.5   | Adenosine                           | Qualitative (no reversible defect)               | 3                  |
| <b>Ingkanisorn(38) §</b> | 2006 | PS     | Suspected or known CAD | 135  | 2 (1)                    | 56 (14)          | 75 (56)     | 23 (17)               | 9 (7)                | 16 (12)                  | 1.5   | Adenosine                           | Qualitative (no fixed / reversible defect)       | 4                  |
| <b>Lo(39)</b>            | 2011 | RS     | Suspected or known CAD | 203  | NS                       | 62 (12)          | 119 (59)    | 32 (16)               | 20 (10)              | 32 (16)                  | 1.5   | Adenosine                           | Qualitative (no reversible defect)               | 5                  |
| <b>Lubbers(40)</b>       | 2012 | PS     | NS                     | 125  | 3 (2)†                   | 61 (11)          | NS (54)     | NS                    | 0 (0)                | NS                       | 1.5   | Adenosine                           | Qualitative (no fixed / reversible defect)       | 5                  |
| <b>Macwar(41)</b>        | 2013 | RS     | Suspected or known CAD | 564  | NS                       | 62 (13)          | 325 (58)    | 293 (52)              | NS                   | NS                       | 1.5   | Adenosine                           | Qualitative (no reversible defect)               | 4                  |
| <b>Pilz(42)</b>          | 2008 | PS     | Suspected CAD          | 218  | 0 (0)                    | 63 (13)          | 122 (56)    | 0 (0)                 | 0 (0)                | 0 (0)                    | 1.5   | Adenosine                           | Qualitative (no fixed / reversible defect)       | 5                  |

CAD=coronary artery disease, MI=myocardial infarction, N=number of patients, NS=not specified, PS=prospective, Revasc=revascularization, RS=retrospective, SD=standard deviation.

† Based on entire population (and not just the population that was followed up).

§ Specific study population.



**eTable 2b. Cardiovascular Magnetic Resonance (CMR) perfusion – absolute number of adverse cardiovascular events**

| Author (ref. #)         | Follow-up, years (SD) | N    | Death/Cardiac death | Negative test |        |     |           | Cardiac death + MI (AER, %) | Population event risk |                             |  |
|-------------------------|-----------------------|------|---------------------|---------------|--------|-----|-----------|-----------------------------|-----------------------|-----------------------------|--|
|                         |                       |      |                     | MI            | Revasc | UAP | N         |                             | Cardiac death + MI    | Cardiac death + MI (AER, %) |  |
| <b>Bertaso(31)</b>      | 1.8 (1.5–2.1)         | 272  | NS / 1              | 1             | 14     | NS  | 2 (0.4%)  | 362                         | 5                     | 0.8%                        |  |
| <b>Bingham(32)</b>      | 2.6 (1.2)             | 610  | NS / NS             | NS            | NS     | NS  | NS (0.8%) | 908                         | 35                    | 1.5%                        |  |
| <b>Bodi(33)</b>         | 1.1 (0.9)             | 1010 | NS / 7              | 10            | NS     | NS  | 17 (1.5%) | 1722                        | 61                    | 3.2%                        |  |
| <b>Chen(6)</b>          | 1.2 (0.3)             | 108  | 0 / 0               | 0             | 2      | NS  | 0 (0.0%)  |                             |                       |                             |  |
| <b>Coelho-Filho(34)</b> | 2.5 (NS–NS)           | 296  | NS / NS             | NS            | NS     | NS  | NS (0.7%) | 405                         | 38                    | 3.8%                        |  |
| <b>Doesch(35)</b>       | 2.5 (0.7)             | 36   | 0 / 0               | 0             | 2      | 0   | 0 (0.0%)  | 81                          | 8                     | 4.0%                        |  |
| <b>Freed(36)</b>        | 2.0 (0.8)             | 106  | 0 / 0               | 0             | 0      | 5   | 0 (0.0%)  | 149                         | 2                     | 0.7%                        |  |
| <b>Hartlage(37)</b>     | 0.8 (NS–NS)           | 82   | 0 / 0               | 0             | 0      | 0   | 0 (0.0%)  | 89                          | 0                     | 0.0%                        |  |
| <b>Ingkanisorn(38)</b>  | 1.3 (NS–NS)           | 107  | 0 / 0               | 0             | 0      | NS  | 0 (0.0%)  |                             |                       |                             |  |
| <b>Lo(39)</b>           | 3.2 (1.6)             | 160  | NS / NS             | NS            | NS     | NS  | NS (1.0%) | 203                         | 15                    | 2.3%                        |  |
| <b>Lubbers(40)</b>      | 1.8 (NS–NS)           | 125  | NS / 0              | 1             | 3      | 0   | 1 (0.4%)  |                             |                       |                             |  |
| <b>Macwar(41)</b>       | 4.0 (1.8)             | 264  | NS / 0              | 0             | 8      | NS  | 0 (0.0%)  | 504                         | 23                    | 1.1%                        |  |
| <b>Pilz(42)</b>         | 1.0 (0.0)             | 218  | 0 / 0               | 0             | 2      | 0   | 0 (0.0%)  |                             |                       |                             |  |

AER=annual event rate, MI=myocardial infarction, N=number of patients, NS=not specified, Revasc=revascularization, SD=standard deviation, UAP=unstable angina pectoris.

**eTable 3a. Cardiovascular Magnetic Resonance (CMR) wall motion – patient and study characteristics**

| Author (ref. #)       | Year | Design | Selection              | N    | Lost to follow up, N (%) | Mean age, y (SD) | Male, N (%) | History of CAD, N (%) | History of MI, N (%) | History of revasc, N (%) | Tesla | Stressor                | Definition 'no ischemia'              | Quality assessment |
|-----------------------|------|--------|------------------------|------|--------------------------|------------------|-------------|-----------------------|----------------------|--------------------------|-------|-------------------------|---------------------------------------|--------------------|
| <b>Bodi(43)</b>       | 2012 | PS     | Suspected or known CAD | 1722 | NS                       | 64 (11)          | 1071 (62)   | NS                    | 389 (23)             | 363 (21)                 | 1.5   | Dipyridamole            | Qualitative (no reversible WMA)       | 4                  |
| <b>Gebker(44)</b>     | 2011 | PS     | Suspected or known CAD | 1532 | 43 (3)                   | 63 (NS)          | 1031 (67)   | 737 (48)              | 481 (31)             | 874 (57)                 | 1.5   | Dobutamine (+ atropine) | Semi-quantitative (no reversible WMA) | 6                  |
| <b>Kelle(45)</b>      | 2011 | PS     | Suspected or known CAD | 1017 | 94 (6)†                  | 61 (11)          | 689 (68)    | 529 (52)              | 251 (25)             | 435 (43)                 | 1.5   | Dobutamine (+ atropine) | Qualitative (no reversible WMA)       | 6                  |
| <b>Korosoglou(46)</b> | 2010 | PS     | Suspected or known CAD | 1493 | 17 (1)                   | 65 (13)          | 1110 (74)   | 816 (55)              | NS                   | 779 (52)                 | 1.5   | Dobutamine (+ atropine) | Semi-quantitative (no reversible WMA) | 5                  |
| <b>Kuijpers(47)</b>   | 2004 | PS     | Suspected or known CAD | 214  | 2 (1)                    | 63 (NS)          | 179 (84)    | 77 (36)               | 74 (35)              | 40 (19)                  | 1.0   | Dobutamine              | Qualitative (no reversible WMA)       | 6                  |
| <b>Wallace(48)</b>    | 2009 | PS     | Suspected or known CAD | 221  | 0 (0)                    | 63 (12)          | 0 (0)       | NS                    | 62 (28)              | 81 (37)                  | 1.5   | Dobutamine (+ atropine) | Qualitative (no reversible WMA)       | 5                  |

CAD=coronary artery disease, MI=myocardial infarction, N=number of patients, NS=not specified, PS=prospective, Revasc=revascularization, RS=retrospective, SD=standard deviation, WMA=wall motion abnormalities.

† Based on entire population (and not just the population that was followed up).

**eTable 3b. Cardiovascular Magnetic Resonance (CMR) wall motion – absolute number of adverse cardiovascular events**

| Author (ref. #)       | Follow-up, years (SD) | N    | Negative test       |    |        |     |                             | Population event risk |                    |                             |
|-----------------------|-----------------------|------|---------------------|----|--------|-----|-----------------------------|-----------------------|--------------------|-----------------------------|
|                       |                       |      | Death/Cardiac death | MI | Revasc | UAP | Cardiac death + MI (AER, %) | N                     | Cardiac death + MI | Cardiac death + MI (AER, %) |
| <b>Bodi(43)</b>       | 1.1 (0.9)             | 1529 | NS / 19             | 16 | NS     | NS  | 35 (2.1%)                   | 1722                  | 61                 | 3.2%                        |
| <b>Gebker(44)</b>     | 2.1 (0.8)             | 923  | NS / 3              | 5  | 46     | NS  | 8 (0.4%)                    | 1532                  | 30                 | 0.9%                        |
| <b>Kelle(45)</b>      | 3.7 (2.0)             | 716  | NS / NS             | NS | NS     | NS  | NS (1.1%)                   | 1017                  | 46                 | 1.2%                        |
| <b>Korosoglou(46)</b> | 2.0 (1.0)             | 1193 | NS / 1              | 4  | 15     | NS  | 5 (0.2%)                    | 1493                  | 53                 | 1.8%                        |
| <b>Kuijpers(47)</b>   | 2.0 (0.9)             | 214  | NS / 1              | 3  | 11     | NS  | 4 (0.9%)                    |                       |                    |                             |
| <b>Wallace(48)</b>    | 6.2 (1.6)             | 161  | NS / 6              | 9  | 27     | 24  | 15 (1.5%)                   | 221                   | 40                 | 2.9%                        |

AER=annual event rate, MI=myocardial infarction, N=number of patients, NS=not specified, Revasc=revascularization, SD=standard deviation, UAP=unstable angina pectoris.

**eTable 4a. Exercise electrocardiography – patient and study characteristics**

| Author (ref. #)              | Year | Design | Selection              | N    | Lost to follow-up, N (%) | Mean age, y (SD) | Male, N (%) | History of CAD, N (%) | History of MI, N (%) | History of revasc, N (%) | Cut off value ST-depression | Quality assessment |
|------------------------------|------|--------|------------------------|------|--------------------------|------------------|-------------|-----------------------|----------------------|--------------------------|-----------------------------|--------------------|
| <b>Bigi(49)</b>              | 2007 | PS     | Suspected or known CAD | 700  | 8 (1)                    | 59 (53-64)       | 595 (85)    | 510 (72)              | NS                   | NS                       | ≥1.0 mm                     | 5                  |
| <b>Bourque(50) §</b>         | 2011 | PS     | Suspected or known CAD | 463  | 46 (9)                   | 54 (NS)          | 332 (72)    | 105 (23)              | 67 (15)              | 89 (19)                  | ≥1.0 mm                     | 5                  |
| <b>Bouzas-Mosquera(51) §</b> | 2009 | PS     | Suspected or known CAD | 4004 | NS                       | 60 (13)          | 2358 (59)   | 1153 (29)             | 871 (22)             | 611 (15)                 | ≥1.0 mm                     | 5                  |
| <b>Calasans(52)</b>          | 2013 | NS     | Suspected CAD          | 397  | NS                       | 57 (11)          | 175 (44)    | 0 (0)                 | 0 (0)                | 0 (0)                    | ≥1.0 mm                     | 5                  |
| <b>Cannan(53) §</b>          | 1992 | NS     | Suspected CAD          | 87   | 1 (1)                    | 57 (NS-NS)       | 65 (75)     | 0 (0)                 | NS                   | 0 (0)                    | ≥1.0 mm                     | 4                  |
| <b>Chatziioannou(54) §</b>   | 1999 | RS     | Suspected or known CAD | 369  | NS                       | 54 (10)&         | 337 (87)†   | 224 (61)              | NS (21)              | NS                       | ≥1.0 mm                     | 3                  |
| <b>Cho(7)</b>                | 2012 | RS     | Suspected CAD          | 2977 | NS                       | 58 (10)          | 1476 (50)   | 0 (0)                 | 0 (0)                | 0 (0)                    | ≥1.0 mm                     | 5                  |
| <b>Coletta(55)</b>           | 1995 | PS     | Suspected or known CAD | 204  | 0 (0)                    | 58 (7)&          | 216 (81)†   | NS                    | 137 (51)†            | 17 (6)†                  | ≥1.0 mm                     | 5                  |
| <b>Dedic(12)</b>             | 2011 | PS     | Suspected CAD          | 409  | 44 (10)                  | 56 (10)          | 244 (52)    | 0 (0)                 | 0 (0)                | 0 (0)                    | ≥1.0 mm                     | 5                  |
| <b>Houghton(56)</b>          | 1990 | RS     | Suspected or known CAD | 64   | 2 (3)                    | 51 (NS)          | 0 (0)       | 15 (23)               | 0 (0)                | NS                       | ≥1.0 mm                     | 4                  |
| <b>Jeetley(57) §</b>         | 2006 | PS     | Suspected or known CAD | 154  | 3 (2)                    | 60 (13)          | 87 (56)     | 48 (31)               | 27 (18)              | 49 (32)                  | ≥1.0 mm                     | 4                  |
| <b>Lichtlen(58)</b>          | 1995 | PS     | Suspected CAD          | 176  | NS                       | 48 (21-68)       | 115 (65)    | 0 (0)                 | NS                   | NS                       | ≥1.0 mm                     | 3                  |
| <b>Marshall(59) §</b>        | 2010 | RS     | Suspected or known CAD | 498  | 18 (3)                   | 53 (10)          | 379 (73)    | 181 (35)              | 65 (13)              | 117 (23)                 | ≥2.0 mm                     | 5                  |
| <b>Mulcahy(60)</b>           | 1991 | PS     | Known CAD              | 172  | 0 (0)                    | 58 (NS)          | 148 (86)    | 172 (100)             | 75 (44)              | 23 (13)                  | ≥1.0 mm                     | 6                  |
| <b>Niemann(61)</b>           | 2004 | RS     | Suspected or known CAD | 2763 | NS                       | 56 (NS)          | 1777 (64)   | NS                    | 771 (28)             | NS                       | NS                          | 4                  |
| <b>Pontone(62)</b>           | 2013 | PS     | Suspected CAD          | 681  | NS                       | 61 (10)          | 461 (68)    | 0 (0)                 | 0 (0)                | 0 (0)                    | >1.0 mm                     | 5                  |
| <b>Raiker(63) §</b>          | 1994 | NS     | Suspected or known CAD | 207  | 1 (0.5)                  | 59 (11)          | 108 (52)    | 42 (20)               | 10 (5)               | NS                       | ≥2.0 mm                     | 4                  |
| <b>Sanchis(64) §</b>         | 2005 | PS     | Suspected or known CAD | 283  | NS                       | 64 (12)†         | 407 (67)†   | 269 (44)†             | NS                   | NS                       | ≥1.0 mm                     | 2                  |
| <b>Sawada(65) §</b>          | 1990 | RS     | Suspected CAD          | 148  | 22 (13)                  | 53 (11)          | 77 (52)     | 0 (0)                 | 0 (0)                | 0 (0)                    | ≥1.0 mm                     | 3                  |
| <b>Vanzetto(66)</b>          | 1999 | NS     | Suspected or known CAD | 1137 | 45 (4)                   | 55 (9)           | 857 (75)    | NS                    | 270 (24)             | 239 (21)                 | ≥1.0 mm                     | 5                  |
| <b>Zanco(67)</b>             | 1995 | PS     | Suspected or known CAD | 147  | 29 (7)                   | 53 (9)           | 121 (82)    | NS                    | 61 (41)              | NS                       | ≥1.0 mm                     | 5                  |

CAD=coronary artery disease, MI=myocardial infarction, N=number of patients, NS=not specified, PS=prospective, Revasc=revascularization, RS=retrospective, SD=standard deviation, UAP=unstable angina pectoris.

† Based on entire population (and not just the population that was followed up).

\$ Specific study population.

**eTable 4b. Exercise electrocardiography – absolute number of adverse cardiovascular events**

| Author (ref. #)            | Follow-up, years (SD) | N    | Death/Cardiac death | Negative test |        |     |            | Cardiac death + MI (AER, %) | Population event risk |                             |  |
|----------------------------|-----------------------|------|---------------------|---------------|--------|-----|------------|-----------------------------|-----------------------|-----------------------------|--|
|                            |                       |      |                     | MI            | Revasc | UAP | N          |                             | Cardiac death + MI    | Cardiac death + MI (AER, %) |  |
| <b>Bigi(49)</b>            | 3.1 (2.0–4.3)         | 700  | 22 / 18             | 40            | 103    | NS  | 58 (2.7%)  |                             |                       |                             |  |
| <b>Bourque(50)</b>         | 2.2 (0.5)             | 417  | 12 / 1              | 3             | 1      | NS  | 4 (0.4%)   | 463                         | 4                     | 0.4%                        |  |
| <b>Bouzas-Mosquera(51)</b> | 4.5 (3.4)             | 4004 | 313 / 63            | 120           | 197    | NS  | 183 (1.0%) |                             |                       |                             |  |
| <b>Calasans(52)</b>        | 6.3 (1.4)             | 397  | 13 / 3              | 13            | NS     | NS  | 16 (0.6%)  |                             |                       |                             |  |
| <b>Cannan(53)</b>          | 1.8 (NS–NS)           | 68   | 0 / 0               | 0             | NS     | NS  | 0 (0.0%)   | 87                          | 0                     | 0.0%                        |  |
| <b>Chatziioannou(54)</b>   | 1.5 (0.2)             | 288  | NS / NS             | NS            | 14     | NS  | 2 (0.5%)   | 369                         | 5                     | 0.9%                        |  |
| <b>Cho(7)</b>              | 3.3 (2.3–4.6)         | 2489 | NS / 1              | 3             | 48     | 2   | 4 (0.0%)   | 2977                        | 9                     | 0.1%                        |  |
| <b>Coletta(55)</b>         | 1.3 (0.7)             | 109  | 0 / 0               | 1             | NS     | NS  | 1 (0.7%)   | 204                         | 11                    | 4.1%                        |  |
| <b>Dedic(12)</b>           | 2.6 (2.1–3.2)         | 172  | NS / 0              | 1             | 6      | 3   | 1 (0.2%)   | 409                         | 10                    | 0.9%                        |  |
| <b>Houghton(56)</b>        | 3.2 (NS)              | 36   | 3 / 2               | 0             | NS     | NS  | 2 (1.7%)   | 64                          | 4                     | 2.0%                        |  |
| <b>Jeetley(57)</b>         | 0.7 (0.4)             | 39   | 0 / 0               | 0             | 2*     | NS  | 0 (0.0%)   |                             |                       |                             |  |
| <b>Lichtlen(58)</b>        | 12.4 (NS–NS)          | 75   | 10 / 3              | 4             | NS     | 8   | 7 (0.8%)   | 154                         | 6                     | 0.3%                        |  |
| <b>Marshall(59)</b>        | 4.1 (NS)              | 367  | NS / 2              | 4             | NS     | NS  | 6 (0.4%)   | 498                         | 7                     | 0.3%                        |  |
| <b>Mulcahy(60)</b>         | 2.0 (NS)              | 68   | NS / 0              | 5             | 3      | 2   | 5 (3.7%)   | 172                         | 9                     | 2.6%                        |  |
| <b>Niemann(61)</b>         | 5.2 (NS)              | 1560 | 106 / 41            | 98            | 226*   | NS  | 139 (1.7%) | 2579                        | 324                   | 2.4%                        |  |
| <b>Pontone(62)</b>         | 3.7 (1.0)             | 262  | NS / 0              | 20            | 45     | NS  | 20 (2.1%)  | 681                         | 73                    | 2.9%                        |  |
| <b>Raiker(63)</b>          | 1.1 (0.2)             | 66   | NS / 0              | 0             | 1      | NS  | 0 (0.0%)   | 207                         | 1                     | 0.4%                        |  |
| <b>Sanchis(64)</b>         | 0.5 (0.0)             | 161  | 0 / 0               | 0             | NS     | NS  | 0 (0.0%)   | 283                         | 3                     | 2.1%                        |  |
| <b>Sawada(65)</b>          | 2.4 (0.7)             | 79   | 0 / 0               | 1             | 2      | NS  | 1 (0.5%)   | 148                         | 2                     | 0.6%                        |  |
| <b>Vanzetto(66)</b>        | 6.0 (1.5)             | 601  | NS / 16             | 19            | NS     | NS  | 35 (1.0%)  | 1137                        | 103                   | 1.5%                        |  |

| Author (ref. #) | Follow-up, years (SD) | N  | Death/Cardiac death | Negative test |        |     |                             | Population event risk |                    |                             |
|-----------------|-----------------------|----|---------------------|---------------|--------|-----|-----------------------------|-----------------------|--------------------|-----------------------------|
|                 |                       |    |                     | MI            | Revasc | UAP | Cardiac death + MI (AER, %) | N                     | Cardiac death + MI | Cardiac death + MI (AER, %) |
| Zanco(67)       | 3.6 (NS)              | 63 | NS / 3              | 2             | NS     | 6   | 5 (2.2%)                    | 147                   | 9                  | 1.7%                        |

AER=annual event rate, MI=myocardial infarction, N=number of patients, NS=not specified, Revasc=revascularization, SD=standard deviation, UAP=unstable angina pectoris. \* Represents (possible) early revascularizations.

**eTable 5a. Positron Emission Tomography (PET) – patient and study characteristics**

| Author (ref. #)      | Year | Design | Selection              | N    | Lost to follow-up, N (%) | Mean age, y (SD) | Male, N (%) | History of CAD, N (%) | History of MI, N (%) | History of revasc, N (%) | Tracer       | Stressor (%)                              | Definition 'no ischemia'                   | Quality assessment |
|----------------------|------|--------|------------------------|------|--------------------------|------------------|-------------|-----------------------|----------------------|--------------------------|--------------|-------------------------------------------|--------------------------------------------|--------------------|
| <b>Chow(68)</b>      | 2005 | RS     | Suspected or known CAD | 629  | NS (NS)                  | 59 (NS)          | 178 (28)    | NS                    | 59 (9)               | 96 (15)                  | Rb-82        | Dipyridamole                              | Qualitative (no fixed / reversible defect) | 4                  |
| <b>Chow(69)</b>      | 2009 | PS     | Suspected or known CAD | 109  | 3 (2)                    | 61 (NS)          | 77 (71)     | NS                    | 50 (46)              | 54 (50)                  | Rb-82 / N-13 | Treadmill exercise (64) / dobutamine (36) | Semi-quantitative (SSS < 4)                | 5                  |
| <b>Dorbala(70)</b>   | 2009 | PS     | Suspected or known CAD | 1432 | NS (NS)                  | 63 (NS)          | NS (48)     | NS (31)               | NS (NS)              | NS (NS)                  | Rb-82        | Dipyridamole (85) / adenosine (15) /      | Semi-quantitative (0% of LV)               | 4                  |
| <b>Tosh, van(71)</b> | 2011 | PS     | Suspected CAD          | 457  | NS                       | 63 (12)          | 0 (0)       | 0 (0)                 | 0 (0)                | 0 (0)                    | Rb-82        | Dipyridamole (NS) / dobutamine (NS)       | Semi-quantitative (SSS = 0)                | 5                  |

CAD=coronary artery disease, MI=myocardial infarction, N=number of patients, NS=not specified, PS=prospective, Revasc=revascularization, RS=retrospective, SD=standard deviation, SSS=summed stress score.



**eTable 5b. Positron Emission Tomography (PET) – absolute number of adverse cardiovascular events**

| Author (ref. #)      | Follow-up, years (SD) | N   | Death/Cardiac death | Negative test |        |     |                             | Population event risk |                    |                             |
|----------------------|-----------------------|-----|---------------------|---------------|--------|-----|-----------------------------|-----------------------|--------------------|-----------------------------|
|                      |                       |     |                     | MI            | Revasc | UAP | Cardiac death + MI (AER, %) | N                     | Cardiac death + MI | Cardiac death + MI (AER, %) |
| <b>Chow(68)</b>      | 2.3 (1.1)             | 629 | NS / 0              | 1             | 13     | NS  | 1 (0.1%)                    |                       |                    |                             |
| <b>Chow(69)</b>      | 2.3 (1.6)             | 46  | NS / 0              | 0             | 1      | NS  | 0 (0.0%)                    | 124                   | 6                  | 2.1%                        |
| <b>Dorbala(70)</b>   | 1.7 (0.7)             | 664 | 39 / 2              | 6             | NS     | NS  | 8 (0.7%)                    | 1432                  | 83                 | 3.4%                        |
| <b>Tosh, van(71)</b> | 3.3 (1.6)             | 457 | 11 / 2              | 3             | 4      | NS  | 5 (0.3%)                    |                       |                    |                             |

AER=annual event rate, MI=myocardial infarction, N=number of patients, NS=not specified, Revasc=revascularization, SD=standard deviation, UAP=unstable angina pectoris.

**eTable 6a. Stress echocardiography – patient and study characteristics**

| Author (ref. #)       | Year | Design | Selection              | N    | Lost to follow-up, N (%) | Mean age, y (SD) | Male, N (%) | History of CAD, N (%) | History of MI, N (%) | History of revasc, N (%) | Stressor (%)                                         | Definition 'no ischemia'                | Quality assessment |
|-----------------------|------|--------|------------------------|------|--------------------------|------------------|-------------|-----------------------|----------------------|--------------------------|------------------------------------------------------|-----------------------------------------|--------------------|
| Afridi(72)            | 1994 | RS     | Suspected or known CAD | 77   | 0 (0)                    | 62 (9)           | 76 (99)     | 41 (53)               | 22 (29)              | 28 (36)                  | Dobutamine                                           | Qualitative (no reversible WMA)         | 5                  |
| Almeida(73)           | 2011 | PS     | Suspected CAD          | 147  | 0 (0)                    | 62 (NS)          | 0 (0)       | 0 (0)                 | 10 (7)               | 17 (12)                  | Dipyridamole                                         | Semi-quantitative (no reversible WMA)   | 5                  |
| Anthopoulos(74)       | 1996 | PS     | Suspected or known CAD | 120  | NS                       | 75 (3)           | 72 (60)     | NS                    | 48 (40)              | NS                       | Dobutamine                                           | Semi-quantitative (no reversible WMA)   | 4                  |
| Baldini(75)           | 2006 | PS     | Suspected or known CAD | 112  | NS                       | 62 (NS)          | 80 (71)     | NS                    | 0 (0)                | NS                       | Dipyridamole (+ atropine)                            | Semi-quantitative (no reversible WMA)   | 3                  |
| Bholasingh(76)        | 2003 | PS     | Suspected or known CAD | 377  | 0 (0)                    | 56 (12)          | 237 (58)    | 77 (20)               | 59 (16)              | NS                       | Dobutamine (+ atropine)                              | Semi-quantitative (no reversible WMA)   | 4                  |
| Biagini(77) §         | 2005 | NS     | Suspected or known CAD | 1434 | 16 (1)                   | 73 (5)           | 965 (67)    | NS                    | NS                   | NS                       | Dobutamine (+ atropine)                              | Semi-quantitative (no reversible WMA)   | 5                  |
| Bouzas-Mosquera(51) § | 2009 | PS     | Suspected or known CAD | 4004 | NS                       | 60 (13)          | 2358 (59)   | 1153 (29)             | 871 (22)             | 611 (15)                 | Treadmill exercise                                   | Semi-quantitative (no reversible WMA)   | 4                  |
| Calasans(52) §        | 2013 | NS     | Suspected CAD          | 397  | NS                       | 57 (11)          | 175 (44)    | 0 (0)                 | 0 (0)                | 0 (0)                    | Treadmill exercise                                   | Semi-quantitative (no reversible WMA)   | 4                  |
| Chuah(78)             | 1998 | PS     | Suspected or known CAD | 860  | 3 (0.3)                  | 70 (10)          | 479 (56)    | 390 (45)              | NS (31)              | NS (24)                  | Dobutamine (+ atropine)                              | Semi-quantitative (no reversible WMA)   | 6                  |
| Chung(79)             | 2004 | RS     | Suspected or known CAD | 233  | 19 (8)                   | 64 (2)           | 108 (46)    | 51 (22)               | 0 (0)                | 0 (0)                    | Treadmill exercise (79) / Dobutamine + atropine (21) | Qualitative (no fixed / reversible WMA) | 6                  |
| Ciaroni(80)           | 2002 | NS     | Suspected CAD          | 94   | 0 (0)                    | 64 (NS)          | 55 (59)     | 0 (0)                 | 0 (0)                | 0 (0)                    | Dobutamine                                           | Semi-quantitative (no reversible WMA)   | 6                  |
| Coletta(55)           | 1995 | PS     | Suspected or known CAD | 268  | 29 (11)                  | 58 (7)           | 216 (81)    | NS                    | 137 (51)             | 17 (6)                   | Dipyridamole                                         | Semi-quantitative (no reversible WMA)   | 4                  |
| Colon(81) §           | 1998 | PS     | Suspected CAD          | 108  | 0 (0)                    | 54 (12)          | 54 (50)     | 0 (0)                 | NS                   | NS                       | Treadmill exercise (72) / Dobutamine + atropine (28) | Qualitative (no reversible WMA)         | 4                  |
| Cordovil(82)          | 2004 | NS     | Suspected or known CAD | 300  | 0 (0)                    | 61 (NS)          | 0 (0)       | 120 (40)              | 70 (23)              | 46 (15)                  | Dobutamine (+ atropine)                              | Semi-quantitative (no reversible WMA)   | 6                  |
| Cortigiani(83)        | 2001 | RS     | Suspected or known CAD | 1733 | 0 (0)                    | 63 (NS)          | 941 (54)    | NS                    | 587 (34)             | 0 (0)                    | Dipyridamole (58) / Dobutamine (42)                  | Semi-quantitative (no reversible WMA)   | 5                  |
| Davar(84)             | 1999 | NS     | Suspected or known CAD | 72   | 0 (0)                    | 60 (11)          | 0 (0)       | NS                    | NS                   | NS                       | Dobutamine (+ atropine)                              | Qualitative (no reversible WMA)         | 5                  |
| Hartlage(37) §        | 2011 | RS     | Suspected CAD          | 166  | 0 (0)                    | 54 (13)          | 37 (22)     | 0 (0)                 | 0 (0)                | 0 (0)                    | Dobutamine + handgrip exercise (+ atropine)          | Qualitative (no reversible WMA)         | 3                  |
| Isma'eel(85)          | 2009 | PS     | Suspected or known CAD | 45   | 4 (8)                    | 68 (6)&          | 0 (0)       | NS                    | NS (22)†             | NS (18)†                 | Dobutamine                                           | NS (no reversible WMA)                  | 5                  |

| Author (ref. #) | Year | Design | Selection              | N    | Lost to follow-up, N (%) | Mean age, y (SD) | Male, N (%) | History of CAD, N (%) | History of MI, N (%) | History of revasc, N (%) | Stressor (%)                                         | Definition 'no ischemia'                           | Quality assessment |
|-----------------|------|--------|------------------------|------|--------------------------|------------------|-------------|-----------------------|----------------------|--------------------------|------------------------------------------------------|----------------------------------------------------|--------------------|
| Ismail(86)      | 1995 | RS     | Suspected or known CAD | 115  | 0 (0)                    | 53 (11)          | 42 (37)     | NS                    | NS                   | NS                       | Bicycle exercise                                     | Qualitative (no fixed / reversible WMA)            | 5                  |
| Kamaran(87)     | 1995 | RS     | Suspected or known CAD | 210  | 0 (0)                    | 60 (NS)          | 84 (40)     | NS                    | 55 (26)              | NS                       | Dobutamine                                           | Qualitative (no reversible WMA)                    | 4                  |
| Krivokapich(88) | 1993 | RS     | Suspected or known CAD | 360  | 0 (0)                    | 62 (13)          | 237 (66)    | NS                    | 127 (35)             | 64 (18)                  | Treadmill exercise                                   | Semi-quantitative (no reversible WMA)              | 5                  |
| Krivokapich(89) | 1999 | PS     | Suspected or known CAD | 558  | 0 (0)                    | 67 (12)          | 220 (39)    | NS                    | 154 (28)             | 129 (23)                 | Dobutamine (+ atropine)                              | Semi-quantitative (no reversible WMA)              | 5                  |
| Low(90)         | 2004 | NS     | Suspected CAD          | 122  | 0 (0)                    | 60 (11)          | 75 (62)     | 0 (0)                 | 0 (0)                | 0 (0)                    | Dobutamine (+ atropine)                              | NS (no fixed / reversible WMA)                     | 6                  |
| Marcovitz(91)   | 1996 | RS     | Suspected or known CAD | 291  | NS (6)                   | 63 (12)          | 146 (50)    | NS                    | NS                   | NS                       | Dobutamine                                           | Qualitative (no reversible WMA)                    | 5                  |
| Marwick(92) §   | 1998 | NS     | Suspected or known CAD | 191  | 2 (1)                    | 63 (13)          | 120 (62)    | 59 (31)               | NS                   | NS                       | Dobutamine (+ atropine)                              | Qualitative (no fixed / reversible WMA)            | 4                  |
| Mesa(93)        | 1999 | RS     | Suspected or known CAD | 100  | 0 (0)                    | 60 (13)          | 0 (0)       | 22 (22)               | 1 (1)                | 10 (10)                  | Dobutamine (+ atropine)                              | Qualitative (no reversible WMA)                    | 6                  |
| Olmos(94)       | 1998 | PS     | Suspected or known CAD | 225  | 23 (9)                   | 56 (12)†         | 189 (76)†   | NS                    | 86 (35)†             | 57 (23)†                 | Treadmill exercise                                   | Semi-quantitative (no fixed / reversible WMA)      | 5                  |
| Pingitore(95)   | 1999 | PS     | Suspected or known CAD | 460  | 23 (4)†                  | 60 (10)          | 379 (82)    | NS                    | 279 (61)             | NS                       | Dipyridamole (+ atropine)                            | Semi-quantitative (no reversible WMA)              | 5                  |
| Sawada(65)      | 1990 | RS     | Suspected CAD          | 148  | 22 (13)                  | 53 (11)          | 77 (52)     | 0 (0)                 | 0 (0)                | 0 (0)                    | Treadmill exercise                                   | Qualitative (no fixed / reversible WMA)            | 4                  |
| Sawada(96)      | 2009 | PS     | Suspected or known CAD | 318  | 6 (2)                    | 59 (12)          | 153 (47)    | NS                    | 94 (29)              | 16 (5)                   | Dobutamine                                           | Semi-quantitative (no reversible WMA)              | 5                  |
| Song(97)        | 2002 | RS     | Suspected or known CAD | 650  | 42 (6)                   | 54 (10)          | 427 (66)    | NS                    | NS                   | 0 (0)                    | Ergonovine                                           | Semi-quantitative (no reversible WMA)              | 5                  |
| Srivastava(98)  | 2008 | RS     | Suspected or known CAD | 727  | 0 (0)                    | 71 (NS)          | 299 (41)    | 218 (30)              | 158 (22)             | 151 (21)                 | Dobutamine (+ atropine)                              | Semi-quantitative (no fixed and no reversible WMA) | 6                  |
| Steinberg(99)   | 1997 | PS     | Suspected or known CAD | 120  | 0 (0)                    | 67 (10)          | 119 (99)    | NS                    | 27 (23)              | 4 (3)                    | Dobutamine                                           | Qualitative (no reversible WMA)                    | 5                  |
| Yao(100)        | 2003 | PS     | Suspected or known CAD | 1500 | NS (2)                   | 59 (13)          | 762 (51)    | NS                    | 248 (17)             | 260 (17)                 | Dobutamine + atropine (66) / Treadmill exercise (34) | Semi-quantitative (no fixed / reversible WMA)      | 5                  |
| Yao(101)        | 2010 | RS     | Suspected or known CAD | 3121 | 0 (0)                    | 60 (13)          | 1494 (48)   | NS                    | 510 (16)             | 348 (11)                 | Dobutamine + atropine (59) / Treadmill exercise (41) | Semi-quantitative (no fixed / reversible WMA)      | 5                  |

| Author (ref. #) | Year | Design | Selection              | N   | Lost to follow-up, N (%) | Mean age, y (SD) | Male, N (%) | History of CAD, N (%) | History of MI, N (%) | History of revasc, N (%) | Stressor (%)     | Definition 'no ischemia'                      | Quality assessment |
|-----------------|------|--------|------------------------|-----|--------------------------|------------------|-------------|-----------------------|----------------------|--------------------------|------------------|-----------------------------------------------|--------------------|
| Zagatina(102)   | 2013 | RS     | Suspected or known CAD | 323 | NS                       | 54 (8)           | 247 (76)    | 255 (79)              | 159 (49)             | NS                       | Bicycle exercise | Semi-quantitative (no fixed / reversible WMA) | 4                  |

CAD=coronary artery disease, MI=myocardial infarction, N=number of patients, NS=not specified, PS=prospective, Revasc=revascularization, RS=retrospective, SD=standard deviation, WMA=wall motion abnormalities.

† Based on entire population (and not just the population that was followed up).

§ Specific study population.

**eTable 6b. Stress echocardiography – absolute number of adverse cardiovascular events**

| Author (ref. #)     | Follow-up, years (SD) | N    | Negative test       |    |        |     |           | Cardiac death + MI (AER, %) | Population event risk |                             |  |
|---------------------|-----------------------|------|---------------------|----|--------|-----|-----------|-----------------------------|-----------------------|-----------------------------|--|
|                     |                       |      | Death/Cardiac death | MI | Revasc | UAP | N         |                             | Cardiac death + MI    | Cardiac death + MI (AER, %) |  |
| Afridi(72)          | 0.8 (NS)              | 67   | NS / NS             | NS | NS     | NS  | 3 (5.6%)  | 77                          | 7                     | 11.4%                       |  |
| Almeida(73)         | 1.3 (NS)              | 128  | 0 / 0               | 0  | NS     | NS  | 0 (0.0%)  | 147                         | 0                     | 0.0%                        |  |
| Anthopoulos(74)     | 1.2 (0.6)             | 38   | NS / 0              | 0  | NS     | NS  | 0 (0.0%)  | 120                         | 13                    | 9.0%                        |  |
| Baldini(75)         | 0.8 (0.6)             | 27   | NS / 0              | 2  | NS     | NS  | 2 (9.3%)  | 112                         | 28                    | 31.3%                       |  |
| Bholasingh(76)      | 0.5 (NS)              | 351  | NS / 1              | 0  | 7      | 6   | 1 (0.6%)  | 377                         | 4                     | 2.1%                        |  |
| Biagini(77) §       | 6.5 (NS)              | 759  | NS / NS             | NS | NS     | NS  | 92 (1.9%) | 1434                        | 294                   | 3.2%                        |  |
| Bouzas-Mosquera(51) | 4.5 (3.4)             | 3335 | NS / NS             | NS | NS     | NS  | NS (0.8%) | 4004                        | 183                   | 1.0%                        |  |
| Calasans(52)        | 6.3 (1.4)             | 329  | NS / NS             | NS | NS     | NS  | 11 (0.5%) | 397                         | 16                    | 0.6%                        |  |
| Chuah(78)           | 2.0 (0.8)             | 539  | NS / 30             | 12 | NS     | NS  | 42 (3.9%) | 860                         | 86                    | 5.0%                        |  |
| Chung(79)           | 2.7 (1.1)             | 233  | NS / 4              | 1  | 7      | NS  | 5 (0.8%)  |                             |                       |                             |  |
| Ciaroni(80)         | 5.3 (0.6)             | 71   | NS / 0              | 0  | 1      | 1   | 0 (0.0%)  | 94                          | 6                     | 1.2%                        |  |
| Coletta(55)         | 1.3 (0.7)             | 222  | NS / 2              | 2  | NS     | 6   | 4 (1.4%)  | 268                         | 15                    | 4.3%                        |  |
| Colon(81)           | 1.1 (0.6)             | 100  | NS / 0              | 0  | NS     | NS  | 0 (0.0%)  | 108                         | 0                     | 0.0%                        |  |
| Cordovil(82)        | 2.3 (NS)              | 205  | NS / 2              | 3  | 7      | NS  | 5 (1.1%)  | 300                         | 15                    | 2.2%                        |  |
| Cortigiani(83)      | 2.8 (NS)              | 1273 | NS / 19             | 41 | 56     | NS  | 60 (1.7%) | 1733                        | 113                   | 2.3%                        |  |
| Davar(84)           | 1.1 (NS)              | 72   | 0 / 0               | 0  | 0      | 0   | 0 (0.0%)  |                             |                       |                             |  |
| Hartlage(37)        | 0.9 (0.1–1.6)         | 164  | 0 / 0               | 1  | 0      | 1   | 1 (0.7%)  | 166                         | 1                     | 0.7%                        |  |
| Isma'eel(85)        | 2.0 (0)               | 35   | 2 / 1               | 2  | 6      | 2   | 3 (4.3%)  | 45                          | 4                     | 4.4%                        |  |
| Ismail(86)          | 1.9 (NS)              | 115  | NS / 0              | 3  | 1      | 1   | 3 (1.4%)  |                             |                       |                             |  |
| Kamaran(87)         | 0.7 (NS–NS)           | 147  | 5 / 1               | 0  | 6      | NS  | 1 (1.0%)  | 210                         | 30                    | 20.4%                       |  |

| Author (ref. #) | Follow-up, years (SD) | N    | Death/Cardiac death | Negative test |        |     |           | Cardiac death + MI (AER, %) | Population event risk |                             |  |
|-----------------|-----------------------|------|---------------------|---------------|--------|-----|-----------|-----------------------------|-----------------------|-----------------------------|--|
|                 |                       |      |                     | MI            | Revasc | UAP | N         |                             | Cardiac death + MI    | Cardiac death + MI (AER, %) |  |
| Krivokapich(88) | 1.0 (NS)              | 295  | NS / 2              | 7             | 25*    | NS  | 9 (3.1%)  | 360                         | 16                    | 4.4%                        |  |
| Krivokapich(89) | 1.0 (NS)              | 422  | NS / 13             | 14            | 26     | NS  | 27 (6.4%) | 558                         | 52                    | 9.3%                        |  |
| Low(90)         | 4.1 (1.6)             | 122  | NS / 1              | 3             | 5      | NS  | 4 (0.8%)  |                             |                       |                             |  |
| Marcovitz(91)   | 1.3 (0.3)             | 148  | 15 / 5              | 3             | NS     | NS  | 8 (4.2%)  | 291                         | 29                    | 7.7%                        |  |
| Marwick(92) §   | 3.2 (1.2)             | 51   | NS / 2              | 1             | 1      | NS  | 3 (1.8)   | 191                         | 24                    | 3.9%                        |  |
| Mesa(93)        | 2.0 (0.9)             | 100  | 6 / 0               | 0             | 2      | NS  | 0 (0.0%)  | NS                          | NS                    |                             |  |
| Olmos(94)       | 3.7 (2.0)             | 117  | NS / 1              | 3             | 5      | 3   | 4 (0.9%)  | 225                         | 15                    | 1.8%                        |  |
| Pingitore(95)   | 3.2 (1.8)             | 253  | NS / 6              | 13            | 22     | NS  | 19 (2.3%) | 460                         | 40                    | 2.7%                        |  |
| Sawada(65)      | 2.4 (0.7)             | 148  | NS / 0              | 2             | 4      | NS  | 2 (0.6%)  |                             |                       |                             |  |
| Sawada(96)      | 5.3 (3.1)             | 206  | NS / NS             | NS            | NS     | NS  | 56 (5.1%) | 318                         | 107                   | 6.3%                        |  |
| Song(97)        | 3.8 (1.9)             | 413  | NS / 3              | 4             | 3*     | 4   | 7 (0.4%)  | 650                         | 19                    | 0.8%                        |  |
| Srivastava(98)  | 3.3 (1.5)             | 727  | NS / 12             | 52            | NS     | NS  | 64 (2.7%) |                             |                       |                             |  |
| Steinberg(99)   | 5.0 (NS)              | 42   | 4 / 0               | 2             | 12*    | NS  | 2 (1.0%)  | 120                         | 12                    | 2.0%                        |  |
| Yao(100)        | 2.7 (1.0)             | 1075 | NS / NS             | NS            | NS     | NS  | NS (0.9%) | 1500                        | 74                    | 1.8%                        |  |
| Yao(101)        | 2.8 (1.1)             | 2072 | NS / NS             | NS            | NS     | NS  | NS (0.8%) | 3121                        | 161                   | 1.8%                        |  |
| Zagatina(102)   | 5.2 (0.2)             | 105  | NS / 1              | 5             | 3*     | NS  | 6 (1.1%)  | 323                         | 48                    | 2.9%                        |  |

AER=annual event rate, MI=myocardial infarction, N=number of patients, NS=not specified, Revasc=revascularization, SD=standard deviation, UAP=unstable angina pectoris.

\* Represents (possible) early revascularizations.

§ Specific study population.

**eTable 7a. Single-photon Emission Computed Tomography (SPECT) – patient and study characteristics**

| Author (ref. #)               | Year | Design | Selection              | N    | Lost to follow-up, N (%) | Mean age, y (SD) | Male, N (%) | History of CAD, N (%) | History of MI, N (%) | History of revasc, N (%) | Tracer             | Stressor (%)                                                                            | Definition 'no ischemia'                                    | Quality assessment |
|-------------------------------|------|--------|------------------------|------|--------------------------|------------------|-------------|-----------------------|----------------------|--------------------------|--------------------|-----------------------------------------------------------------------------------------|-------------------------------------------------------------|--------------------|
| <b>Acampa(103)</b>            | 2014 | RS     | Suspected or known CAD | 828  | 44 (5)                   | 60 (NS)          | 470 (57)    | NS                    | 160 (19)             | 239 (29)                 | Tc-99m MIBI        | Treadmill exercise (59) / Dipyridamole (41)                                             | Semi-quantitative (SSS < 3)                                 | 5                  |
| <b>Akinboboye(104)</b>        | 2001 | RS     | Suspected or known CAD | 529  | NS                       | 57 (16)          | NS (29)     | NS                    | NS (11)              | 0 (0)                    | Thallium-201       | Treadmill exercise (73) / Dipyridamole (29) / Dobutamine (9)                            | NS (included only 'normal' scans)                           | 4                  |
| <b>Basic(105)</b>             | 2006 | PS     | Suspected or known CAD | 51   | 0 (0)                    | 60 (11)          | 34 (67)     | 26 (51)               | 4 (8)                | NS                       | Tc-99m MIBI        | Dipyridamole                                                                            | Semi-quantitative (included only 'normal perfusion')        | 5                  |
| <b>Bom(106)</b>               | 2014 | NS     | Suspected CAD          | 762  | NS                       | 63 (12)          | 319 (42)    | 0 (0)                 | 0 (0)                | 0 (0)                    | Tc-99m Tetrofosmin | Adenosine (80) / Adenosine + exercise (16) / Dobutamine (2) / Dobutamine + atropine (1) | Qualitative (no fixed / reversible defect)                  | 5                  |
| <b>Bucerius(107)</b>          | 2009 | RS     | Suspected or known CAD | 90   | 1 (1)                    | 75 (4)           | 54 (60)     | 46 (51)               | 21 (23)              | 33 (37)                  | Tc-99m MIBI        | Bicycle exercise                                                                        | Semi-quantitative (SDS < 2)                                 | 6                  |
| <b>Boyne(108)</b>             | 1997 | PS     | Suspected or known CAD | 229  | 26 (10)                  | 58 (12)          | 114 (50)    | NS                    | 54 (27)              | NS                       | Tc-99m MIBI        | Exercise                                                                                | Qualitative and quantitative (no fixed / reversible defect) | 4                  |
| <b>Calnon(109)</b>            | 2001 | NS     | Suspected or known CAD | 308  | 3 (1)                    | 62 (NS)          | 142 (46)    | NS                    | 93 (31)              | 50 (16)                  | Tc-99m MIBI        | Dobutamine                                                                              | NS ('normal' scans)                                         | 5                  |
| <b>Chatziioannou(54) §</b>    | 1999 | RS     | Suspected or known CAD | 388  | NS                       | 54 (10)          | 337 (87)    | 224 (58)              | 67 (17)              | 155 (40)                 | Tc-99m MIBI        | Treadmill exercise                                                                      | Qualitative (no fixed / reversible defect)                  | 4                  |
| <b>Dawson(110)</b>            | 2009 | PS     | Suspected or known CAD | 261  | NS                       | 64 (NS)          | 131 (50)    | 134 (52)              | 99 (38)              | NS                       | Tc-99m MIBI        | Dipyridamole                                                                            | Qualitative (no fixed / reversible defect)                  | 4                  |
| <b>Dona(111)</b>              | 2011 | PS     | Suspected or known CAD | 114  | 3 (5)                    | 67 (NS)          | 67 (59)     | NS                    | NS                   | 43 (38)                  | Tc-99m MIBI        | Bicycle exercise / Dipyridamole                                                         | Semi-quantitative (SDS ≤ 1)                                 | 5                  |
| <b>Doukky(112)</b>            | 2013 | PS     | Suspected or known CAD | 1236 | 14 (1)                   | 58 (12)          | 642 (52)    | 79 (6)                | 10 (1)               | 74 (6)                   | Tc-99m MIBI        | Treadmill exercise / Adenosine (+ low-level exercise)                                   | Semi-quantitative (SSS = 0)                                 | 6                  |
| <b>Ferreira(113)</b>          | 2013 | RS     | Suspected or known CAD | 790  | 67 (8)                   | 63 (12)          | 378 (48)    | 190 (24)              | NS                   | 157 (20)                 | Tc-99m Tetrofosmin | Adenosine (68) / Exercise (32)                                                          | Semi-quantitative (SSS ≤ 1)                                 | 5                  |
| <b>Filipiak-Strzecka(114)</b> | 2013 | RS     | Suspected or known CAD | 732  | 0 (0)                    | 57 (9)           | 299 (41)    | NS                    | 109 (15)             | 75 (10)                  | Tc-99m MIBI        | Treadmill exercise                                                                      | Qualitative (no reversible defect)                          | 5                  |

| Author (ref. #)          | Year | Design | Selection              | N    | Lost to follow-up, N (%) | Mean age, y (SD) | Male, N (%) | History of CAD, N (%) | History of MI, N (%) | History of revasc, N (%) | Tracer                                        | Stressor (%)                                                                         | Definition 'no ischemia'                         | Quality assessment |
|--------------------------|------|--------|------------------------|------|--------------------------|------------------|-------------|-----------------------|----------------------|--------------------------|-----------------------------------------------|--------------------------------------------------------------------------------------|--------------------------------------------------|--------------------|
| <b>Galassi(115)</b>      | 2001 | NS     | Suspected or known CAD | 459  | 56 (11)                  | 58 (10)          | 357 (78)    | NS                    | 252 (55)             | 40 (9)                   | Tc-99m Tetrofosmin                            | Treadmill exercise                                                                   | Semi-quantitative (SSS = 0)                      | 4                  |
| <b>Gentile(116)</b>      | 2001 | PS     | Suspected CAD          | 124  | 8 (6)                    | 71 (NS)&         | 90 (68)&    | 0 (0)                 | 0 (0)                | 0 (0)                    | Thallium-201                                  | Bicycle exercise (89) / Dipyridamole (18)                                            | Qualitative (no reversible defect)               | 5                  |
| <b>Gibbons(117) \$</b>   | 1999 | RS     | Suspected or known CAD | 4473 | 176 (4)                  | 61 (11)          | 2046 (46)   | NS                    | 241 (5)              | 0 (0)                    | Thallium-201 / Tc-99m MIBI                    | Treadmill exercise                                                                   | NS (included only 'normal stress scans')         | 4                  |
| <b>Gibson(118)</b>       | 2002 | PS     | Suspected CAD          | 652  | 77 (11)                  | 52 (13)          | 224 (34)    | 0 (0)                 | 0 (0)                | 0 (0)                    | Tc-99m MIBI                                   | Treadmill exercise (93) / Dipyridamole (7)                                           | NS (no fixed / reversible defect)                | 5                  |
| <b>Groutars(119)</b>     | 2002 | PS     | Suspected or known CAD | 597  | 13 (2)                   | 62 (11)          | 348 (58)    | NS                    | 193 (32)             | 178 (30)                 | Rest Thallium 201 / stress Tc-99m Tetrofosmin | Adenosine (58) / Bicycle exercise (42)                                               | Semi-quantitative (SSS < 4)                      | 5                  |
| <b>Hachamovitch(120)</b> | 1997 | RS     | Suspected or known CAD | 1079 | 71 (6)&                  | 70 (NS)          | 542 (50)    | NS                    | 346 (32)             | 362 (34)                 | Rest Thallium-201 / stress Tc-99m MIBI        | Adenosine                                                                            | Semi-quantitative (SSS < 4)                      | 5                  |
| <b>Hage(121) \$</b>      | 2006 | NS     | NS                     | 65   | NS                       | 66 (13)          | 13 (20)     | NS                    | 0 (0)                | 0 (0)                    | Tc-99m MIBI / Tetrofosmin                     | Adenosine                                                                            | Qualitative (included only 'normal' scans)       | 3                  |
| <b>Hakeem(122)</b>       | 2008 | NS     | Suspected or known CAD | 1084 | NS                       | 63 (10)          | 1029 (95)   | 417 (40)              | 194 (19)             | 328 (31)                 | Tc-99m MIBI / Tetrofosmin                     | Adenosine (68) / Treadmill exercise (32)                                             | Semi-quantitative (SSS < 4)                      | 5                  |
| <b>Iqbal(123)</b>        | 2012 | RS     | Suspected or known CAD | 2000 | 0 (0)                    | 59 (12)          | 900 (45)    | 481 (24)              | 133 (7)              | 362 (18)                 | Tc-99m MIBI                                   | Adenosine (50) / Regadenoson (50)                                                    | NS (included only 'normal perfusion pattern')    | 6                  |
| <b>Jeong(124) \$</b>     | 2013 | RS     | Suspected CAD          | 337  | 42 (11)                  | 61 (9)           | 184 (50)    | 0 (0)                 | 0 (0)                | 0 (0)                    | Thallium-201 rest / Tc99m MIBI stress         | Dipyridamole                                                                         | NS (included only 'normal perfusion')            | 4                  |
| <b>Kaminek(125)</b>      | 2002 | NS     | Suspected or known CAD | 149  | NS                       | 54 (9)           | 114 (77)    | NS                    | 73 (49)              | NS                       | Thallium-201                                  | Bicycle exercise                                                                     | Qualitative (no reversible defect)               | 3                  |
| <b>Klondas(126) \$</b>   | 2003 | NS     | Suspected or known CAD | 49   | NS                       | 67 (10)          | 6 (12)      | NS                    | 1 (2)                | 5 (10)                   | Thallium-201 / Tc-99m MIBI                    | Dipyridamole (51) / Adenosine (49)                                                   | NS (included only 'normal' scans)                | 3                  |
| <b>Koehli(127)</b>       | 2006 | RS     | Suspected or known CAD | 200  | 5 (3)                    | 65 (10)          | 114 (57)    | 50 (25)               | NS                   | NS                       | Rest Thallium-201 / stress Tc-99m MIBI        | Bicycle exercise (41) / Dipyridamole (53) / Dobutamine +atropine (3) / Adenosine (5) | Semi-quantitative (no fixed / reversible defect) | 5                  |



| Author (ref. #)           | Year | Design | Selection              | N    | Lost to follow-up, N (%) | Mean age, y (SD) | Male, N (%) | History of CAD, N (%) | History of MI, N (%) | History of revasc, N (%) | Tracer                     | Stressor (%)                                                              | Definition 'no ischemia'                           | Quality assessment |
|---------------------------|------|--------|------------------------|------|--------------------------|------------------|-------------|-----------------------|----------------------|--------------------------|----------------------------|---------------------------------------------------------------------------|----------------------------------------------------|--------------------|
| <b>Leslie(128)</b>        | 2005 | RS     | NS                     | 718  | NS                       | 60 (11)          | NS          | NS                    | NS (26)              | NS                       | Tc-99m MIBI                | Treadmill exercise (77) / Dipyridamole (15) / Dipyridamole + exercise (7) | Qualitative (no reversible defect)                 | 4                  |
| <b>Lima(129)</b>          | 2004 | RS     | Suspected CAD          | 321  | 7 (2)                    | 79 (3)           | 121 (38)    | 0 (0)                 | 0 (0)                | 0 (0)                    | Tc-99m MIBI                | Dipyridamole (50) / Treadmill exercise (50)                               | Semi-quantitative (no reversible defect)           | 6                  |
| <b>Miernik(130) \$</b>    | 2012 | PS     | Suspected or known     | 115  | 0 (0)                    | 58 (9)           | 0 (0)       | NS                    | 0 (0)                | 0 (0)                    | Tc-99m MIBI                | Treadmill exercise                                                        | Quantitative (<10% reversible perfusion defect)    | 3                  |
| <b>Mouden(131) \$</b>     | 2014 | RS     | Suspected CAD          | 282  | 0 (0)                    | 69 (9)           | 177 (63)    | 0 (0)                 | 0 (0)                | 0 (0)                    | Tc-99m Tetrofosmin         | Adenosine (+ low-level exercise) (95) / Dobutamine (5)                    | Semi-quantitative (no reversible defect)           | 5                  |
| <b>Nabi(132) \$</b>       | 2012 | PS     | Suspected or known CAD | 1561 | 15 (1)                   | 56 (14)          | 663 (42)    | 189 (12)              | NS                   | NS                       | NS (Tc-99m)                | Adenosine (92) / Treadmill exercise (8) / Dobutamine (0.2)                | Quantitative (no fixed or reversible defect)       | 3                  |
| <b>Nishimura(133)</b>     | 2008 | PS     | Suspected or known CAD | 4031 | 223 (5)                  | 66 (10)          | 2580 (64)   | NS                    | 1172 (29)            | 1436 (36)                | Tc-99m Tetrofosmin         | Exercise (69) / Dipyridamole (15) / Adenosine (14)                        | Semi-quantitative (SSS < 4)                        | 5                  |
| <b>Olmos(94)</b>          | 1998 | PS     | Suspected or known CAD | 225  | 23 (9)                   | 56 (12)&         | 189 (76)&   | NS                    | 86 (35)&             | 57 (23)&                 | Thallium-201               | Treadmill exercise                                                        | Semi-quantitative (no reversible defect)           | 5                  |
| <b>Otsuka(134)</b>        | 2014 | PS     | NS                     | 543  | 24 (4)                   | 65 (NS)          | 334 (62)    | NS                    | 0 (0)                | 0 (0)                    | Thallium-201               | Bicycle exercise                                                          | Qualitative ('without any perfusion abnormalities) | 4                  |
| <b>Pazhenkottil(135)</b>  | 2011 | RS     | Suspected or known CAD | 876  | NS                       | 65 (11)          | 558 (64)    | 343 (39)              | NS                   | NS                       | Tc-99m Tetrofosmin         | Adenosine                                                                 | Semi-quantitative (SSS < 1)                        | 4                  |
| <b>Petix(136)</b>         | 2005 | PS     | Suspected or known CAD | 333  | 4 (0.0)                  | 63 (10)          | 217 (65)    | NS                    | 126 (38)             | 87 (26)                  | Tc-99m MIBI                | Bicycle exercise (75) / Dipyridamole (25)                                 | Semi-quantitative (SSS < 4)                        | 5                  |
| <b>Raziei(137)</b>        | 2011 | PS     | Suspected or known CAD | 1047 | NS                       | 60 (12)          | 248 (24)    | NS                    | 9 (1)                | 0 (0)                    | Tc-99m MIBI                | Dipyridamole (63) / Treadmill exercise (37) / Dobutamine (0.4)            | NS (included only 'normal' scans)                  | 4                  |
| <b>Romero-Farina(138)</b> | 2015 | NS     | Suspected or known CAD | 2922 | NS                       | 63 (13)          | 1275 (44)   | 508 (17)              | NS                   | NS                       | Tc-99m Tetrofosmin         | Exercise (70) (+ dipyridamole (16))/Dipyridamole (14)                     | Semi-quantitative (no fixed / reversible defect)   | 4                  |
| <b>Sharma(139) \$</b>     | 2010 | RS     | Suspected CAD          | 76   | 4 (5%)                   | 66 (9)           | 10 (13)     | 0 (0)                 | 0 (0)                | 0 (0)                    | Thallium-201 / Tc-99m MIBI | Adenosine                                                                 | Semi-quantitative (included only 'normal' MPI)     | 5                  |

| Author (ref. #)      | Year | Design | Selection              | N      | Lost to follow-up, N (%) | Mean age, y (SD) | Male, N (%) | History of CAD, N (%) | History of MI, N (%) | History of revasc, N (%) | Tracer                     | Stressor (%)                                                           | Definition 'no ischemia'                         | Quality assessment |
|----------------------|------|--------|------------------------|--------|--------------------------|------------------|-------------|-----------------------|----------------------|--------------------------|----------------------------|------------------------------------------------------------------------|--------------------------------------------------|--------------------|
| Schinkel(140)        | 2002 | PS     | Suspected or known CAD | 473    | 3 (1)&                   | 61 (12)          | 273 (58)    | NS                    | 210 (44)             | 167 (35)                 | Tc-99m MIBI                | Dobutamine (+atropine)                                                 | Semi-quantitative (no fixed / reversible defect) | 5                  |
| Schinkel(141)        | 2002 | PS     | Suspected or known CAD | 693    | 2 (0.3)&                 | 60 (10)          | 419 (60)    | NS                    | 194 (28)             | 211 (30)                 | Tc-99m Tetrofosmin         | Dobutamine (+atropine)                                                 | Semi-quantitative (no fixed / reversible defect) | 5                  |
| Shimoni(142) §       | 2010 | PS     | Suspected or known CAD | 53     | 0 (0)                    | 75 (7)&          | 43 (74)&    | NS                    | 17 (29)&             | 23 (40)&                 | Thallium-201               | Dipyridamole                                                           | NS (no fixed / reversible defect)                | 4                  |
| Simonsen(143)        | 2013 | NS     | Suspected or known CAD | 2157   | 7 (0.3)                  | 61 (0)           | 1152 (53)   | 720 (33)              | 394 (18)             | 619 (29)                 | Tc-99m MIBI                | Exercise / Adenosine / Dipyridamole / Dobutamine                       | Semi-quantitative (SSS < 4)                      | 6                  |
| Soman(144)           | 1999 | RS     | Suspected or known CAD | 435    | 35 (8)                   | 57 (10)          | NS (56)     | 28 (6)&               | NS                   | 24 (5)&                  | Tc-99m MIBI                | Treadmill exercise (90) / Dipyridamole (10)                            | NS (included only 'normal' scans)                | 5                  |
| Stratmann(145)       | 1994 | RS     | Suspected or known CAD | 534    | 20 (3)                   | 65 (9)           | 519 (97)    | NS                    | 197 (37)             | 107 (20)                 | Tc-99m MIBI                | Dipyridamole                                                           | Qualitative (no reversible defect)               | 5                  |
| Stratmann(146)       | 1994 | RS     | Suspected or known CAD | 521    | 10 (2)                   | 59 (NS)          | 511 (98)    | 190 (36)              | 184 (35)             | 132 (25)                 | Tc-99m MIBI                | Treadmill exercise                                                     | Qualitative (no reversible defect)               | 6                  |
| Sugihara(147)        | 1998 | PS     | Suspected or known CAD | 182    | 0 (0)                    | 68 (11)          | 105 (58)    | NS                    | NS                   | NS                       | Tc-99m MIBI                | Treadmill exercise                                                     | Qualitative (no reversible defect)               | 4                  |
| Travin(148)          | 1997 | PS     | Suspected or known CAD | 2228   | 149 (6)                  | 63 (NS)          | 1226 (52)   | NS                    | 711 (30)             | 308 (13)                 | Tc-99m MIBI                | Treadmill exercise (64) / Dipyridamole (43)                            | Semi-quantitative (no fixed / reversible defect) | 5                  |
| Travin(149)          | 2004 | RS     | Suspected or known CAD | 3207   | 332 (9)                  | 62 (13)          | 1620 (51)   | 937 (29)              | 777 (24)             | 789 (25)                 | Tc-99m MIBI                | Treadmill exercise (59)/Dipyridamole (36)/Dobutamine (5)/Adenosine(<1) | Semi-quantitative (SSS = 0)                      | 6                  |
| Uebles(150)          | 2009 | PS     | Known CAD              | 260    | 1 (0.4)                  | 60 (10)          | 174 (67)    | 260 (100)             | 57 (22)              | 89 (34)                  | Tc-99m MIBI                | Bicycle (62) / Pharmacological stress (38)                             | Semi-quantitative (SDS < 5)                      | 6                  |
| Uthamalingam (151) § | 2013 | NS     | Suspected CAD          | 43     | 0 (0)                    | 73 (9)           | 10 (23)     | 0 (0)                 | 0 (0)                | 0 (0)                    | Tc-99m MIBI                | Regadenoson                                                            | NS (included only 'normal' scans)                | 5                  |
| Vanzetto(66)         | 1999 | RS     | Suspected or known CAD | 1137   | 45 (4)                   | 55 (9)           | 857 (75)    | NS                    | 270 (24)             | 239 (21)                 | Thallium-201               | Bicycle exercise                                                       | Qualitative (no fixed / reversible defect)       | 5                  |
| Wolak(152)           | 2014 | RS     | Suspected CAD          | 11,812 | NS                       | 61 (NS)          | 4928 (42)   | 0 (0)                 | 0 (0)                | 0 (0)                    | Thallium-201 / Tc-99m MIBI | Treadmill exercise / Dipyridamole / Dobutamine                         | Quantitative (perfusion defect <5%)              | 5                  |

| Author (ref. #)  | Year | Design | Selection              | N   | Lost to follow-up, N (%) | Mean age, y (SD) | Male, N (%) | History of CAD, N (%) | History of MI, N (%) | History of revasc, N (%) | Tracer      | Stressor (%)     | Definition 'no ischemia'                   | Quality assessment |
|------------------|------|--------|------------------------|-----|--------------------------|------------------|-------------|-----------------------|----------------------|--------------------------|-------------|------------------|--------------------------------------------|--------------------|
| <b>Yang(153)</b> | 2006 | RS     | Suspected or known CAD | 155 | 4 (3)                    | 54 (NS)          | 117 (75)    | 88 (57)               | 0 (0)                | 0 (0)                    | Tc-99m MIBI | Bicycle exercise | Qualitative (no fixed / reversible defect) | 6                  |
| <b>Zanco(67)</b> | 1995 | PS     | Suspected or known CAD | 147 | 29 (7)                   | 53 (9)           | 121 (82)    | NS                    | 61 (41)              | NS                       | Tc-99m MIBI | Bicycle exercise | Semi-quantitative (no reversible defect)   | 4                  |

CAD=coronary artery disease, MI=myocardial infarction, N=number of patients, NS=not specified, PS=prospective, Revasc=revascularization, RS=retrospective, SD=standard deviation, SDS=summed difference score, SSS=summed stress score.

† Based on entire population (and not just the population that was followed up).

§ Specific study population.

**eTable 7b. Single-photon Emission Computed Tomography (SPECT) – absolute number of adverse cardiovascular events**

| Author (ref. #)               | Follow-up, years (SD) | N    | Death/Cardiac death | Negative test |        |     |           | Cardiac death + MI (AER, %) | Population event risk |                             |  |
|-------------------------------|-----------------------|------|---------------------|---------------|--------|-----|-----------|-----------------------------|-----------------------|-----------------------------|--|
|                               |                       |      |                     | MI            | Revasc | UAP | N         |                             | Cardiac death + MI    | Cardiac death + MI (AER, %) |  |
| <b>Acampa(103)</b>            | 4.4 (3.7-5.3)         | 828  | NS / 13             | 11            | NS     | NS  | 24 (0.7%) |                             |                       |                             |  |
| <b>Akinboboye(104)</b>        | 1.5 (0.5)             | 529  | NS / 11             | 7             | NS     | NS  | 18 (2.3%) |                             |                       |                             |  |
| <b>Basic(105)</b>             | 2.4 (NS)              | 27   | NS / 0              | 0             | 0      | 0   | 0 (0.0%)  | 51                          | 2                     | 1.6%                        |  |
| <b>Bom(106)</b>               | 2.0 (NS)              | 762  | 15 / 1              | 8             | 33     | NS  | 9 (0.6%)  |                             |                       |                             |  |
| <b>Bucerius(107)</b>          | 2.7 (1.1)             | 44   | NS / 1              | 1             | 4      | NS  | 2 (1.7%)  | 90                          | 6                     | 2.5%                        |  |
| <b>Boyne(108)</b>             | 1.6 (0.4)             | 155  | 0 / 0               | 2             | NS     | NS  | 2 (0.8%)  | 229                         | 2                     | 0.5%                        |  |
| <b>Calnon(109)</b>            | 1.9 (1.1)             | 150  | 20 / 2              | 5             | 0      | NS  | 7 (2.5%)  | 308                         | 33                    | 5.6%                        |  |
| <b>Chatziannou(54)</b>        | 1.5 (0.2)             | 231  | NS / 0              | 0             | 4      | NS  | 0 (0.0%)  | 388                         | 5                     | 0.9%                        |  |
| <b>Dawson(110)</b>            | 1.2 (0.4)             | 172  | NS / 3              | 4             | NS     | NS  | 7 (3.4%)  | 261                         | 22                    | 7.0%                        |  |
| <b>Dona(111)</b>              | 1.8 (0.8)             | 114  | NS / 1              | 2             | 15     | NS  | 3 (1.5%)  |                             |                       |                             |  |
| <b>Doukky(112)</b>            | 2.3 (0.8)             | 1236 | 18 / 5              | 6             | 23*    | NS  | 11 (0.4%) |                             |                       |                             |  |
| <b>Ferreira(113)</b>          | 3.6 (1.1)             | 790  | 57 / 10             | 9             | 19     | NS  | 19 (0.7%) |                             |                       |                             |  |
| <b>Filipiak-Strzecka(114)</b> | 4.8 (0.7)             | 421  | 11 / 5              | 22            | 23     | NS  | 27 (1.3%) | 732                         | 74                    | 2.1%                        |  |
| <b>Galassi(115)</b>           | 3.2 (NS-NS)           | 106  | 0 / 0               | 3             | 6      | NS  | 3 (0.9%)  | 459                         | 35                    | 2.4%                        |  |
| <b>Gentile(116)</b>           | 2.3 (NS)              | 19   | 1 / 0               | 0             | 1      | NS  | 0 (0.0%)  | 124                         | 12                    | 4.2%                        |  |
| <b>Gibbons(117)</b>           | 3.0 (2.0)             | 4473 | NS / 26             | 57            | 75     | NS  | 83 (0.6%) |                             |                       |                             |  |
| <b>Gibson(118)</b>            | 1.9 (0.5)             | 652  | 2 / 0               | 1             | 1      | 2   | 1 (0.1%)  |                             |                       |                             |  |
| <b>Groutars(119)</b>          | 1.9 (0.8)             | 278  | NS / 2              | 3             | NS     | NS  | 5 (0.9%)  | 597                         | 46                    | 4.1%                        |  |
| <b>Hachamovitch(120)</b>      | 2.3 (0.8)             | 445  | NS / 9              | 7             | NS     | NS  | 16 (1.6%) | 1079                        | 120                   | 4.8%                        |  |
| <b>Hage(121)</b>              | 2.0 (0.7)             | 65   | 1 / 0               | 0             | 6      | NS  | 0 (0.0%)  |                             |                       |                             |  |

| Author (ref. #)    | Follow-up, years (SD) | N    | Death/Cardiac death | Negative test |        |     |           | Cardiac death + MI (AER, %) | Population event risk |                             |  |
|--------------------|-----------------------|------|---------------------|---------------|--------|-----|-----------|-----------------------------|-----------------------|-----------------------------|--|
|                    |                       |      |                     | MI            | Revasc | UAP | N         |                             | Cardiac death + MI    | Cardiac death + MI (AER, %) |  |
| Hakeem(122)        | 2.1 (NS-NS)           | 684  | 56 / 11             | 15            | NS     | NS  | 26 (1.8%) | 1048                        | 79                    | 3.6%                        |  |
| Iqbal(123)         | 2.0 (0.0)             | 2000 | NS / NS             | NS            | NS     | NS  | 43 (1.1%) |                             |                       |                             |  |
| Jeong(124)         | 2.7 (1.0)             | 337  | NS / NS             | NS            | NS     | NS  | 6 (0.7%)  |                             |                       |                             |  |
| Kaminek(125)       | 1.7 (0.8)             | 74   | NS / 4              | 0             | 8*     | NS  | 4 (3.2%)  | 149                         | 21                    | 8.3%                        |  |
| Klodos(126)        | 2.3 (1.7)             | 49   | 3 / 2               | 4             | 5      | NS  | 6 (5.3%)  |                             |                       |                             |  |
| Koehli(127)        | 3.0 (NS-NS)           | 85   | NS / 0              | 0             | 2      | NS  | 0 (0.0%)  | 200                         | 14                    | 2.3%                        |  |
| Leslie(128)        | 5.6 (1.1)             | 437  | NS / NS             | NS            | NS     | NS  | 27 (1.1%) | 718                         | 79                    | 2.0%                        |  |
| Lima(129)          | 2.8 (1.3)             | 260  | NS / NS             | NS            | NS     | NS  | 16 (2.2%) | 321                         | 35                    | 3.9%                        |  |
| Miernik(130)       | 3.6 (2.6)             | 95   | NS / 0              | 0             | 0      | NS  | 0 (0.0%)  | 115                         | 0                     | 0.0%                        |  |
| Mouden (131)       | 2.0 (0.9)             | 177  | NS / 1              | NS            | 35*    | NS  | 1 (0.3%)  | 282                         | 2                     | 0.4%                        |  |
| Nabi(132)          | 0.6 (0.2)             | 1441 | 0 / 0               | 8             | NS     | NS  | 8 (0.9%)  | 1561                        | 17                    | 1.8%                        |  |
| Nishimura(133)     | 3.0 (0.0)             | 1862 | NS / 11             | 15            | NS     | NS  | 26 (0.5%) | 4031                        | 96                    | 0.8%                        |  |
| Olmos(94)          | 3.7 (2.0)             | 115  | NS / 1              | 3             | NS     | NS  | 4 (0.9%)  | 225                         | 15                    | 1.8%                        |  |
| Otsuka(134)        | 3.4 (0.8)             | 543  | NS / 3              | 9             | 11     | NS  | 12 (0.6%) |                             |                       |                             |  |
| Pazhenkottil(135)  | 2.3 (0.6)             | 43   | NS / 0              | 0             | NS     | NS  | 0 (0.0%)  | 876                         | 5                     | 0.2%                        |  |
| Petix(136)         | 1.6 (1.3)             | 79   | NS / NS             | NS            | NS     | NS  | NS (0.9%) | 333                         | 30                    | 5.6%                        |  |
| Raziei(137)        | 1.0 (0.0)             | 1047 | 14 / 2              | 1             | 3      | NS  | 3 (0.3%)  |                             |                       |                             |  |
| Romero-Farina(138) | 5.0 (3.3)             | 2922 | 269 / NS            | NS            | NS     | NS  | 81 (0.6%) |                             |                       |                             |  |
| Sharma(139)        | 2.0 (1.1)             | 76   | NS / 0              | 0             | 1      | NS  | 0 (0.0%)  |                             |                       |                             |  |
| Schinkel(140)      | 8.0 (1.4)             | 161  | NS / NS             | NS            | NS     | NS  | NS (1.2%) | 473                         | 101                   | 2.7%                        |  |
| Schinkel(141)      | 3.1 (1.4)             | 312  | NS / NS             | NS            | NS     | NS  | NS (1.5%) | 693                         | 85                    | 4.0%                        |  |
| Shimoni(142)       | 4.3 (NS-NS)           | 10   | NS / 2              | 0             | 0      | 0   | 2 (4.7%)  |                             |                       |                             |  |

| Author (ref. #) | Follow-up, years (SD) | N      | Negative test       |     |        |     |                             | Population event risk |                    |                             |
|-----------------|-----------------------|--------|---------------------|-----|--------|-----|-----------------------------|-----------------------|--------------------|-----------------------------|
|                 |                       |        | Death/Cardiac death | MI  | Revasc | UAP | Cardiac death + MI (AER, %) | N                     | Cardiac death + MI | Cardiac death + MI (AER, %) |
| Simonsen(143)   | 6.2 (NS)              | 1327   | NS / NS             | NS  | NS     | NS  | 54 (0.7%)                   | 2157                  | 182                | 1.4%                        |
| Soman(144)      | 2.5 (1.3)             | 435    | NS / 2              | 0   | 5      | NS  | 2 (0.2%)                    |                       |                    |                             |
| Stratmann(145)  | 1.1 (0.4)             | 372    | NS / NS             | NS  | NS     | NS  | 30 (7.3%)                   | 534                   | 58                 | 9.9%                        |
| Stratmann(146)  | 1.1 (0.4)             | 321    | NS / NS             | NS  | NS     | NS  | 8 (2.3%)                    | 521                   | 24                 | 4.2%                        |
| Sugihara(147)   | 1.1 (0.6)             | 157    | NS / 1              | 0   | 3      | 4   | 1 (0.6%)                    | 182                   | 3                  | 1.5%                        |
| Travin(148)     | 1.3 (0.7)             | 987    | NS / NS             | NS  | NS     | NS  | 15 (1.2%)                   | 2086                  | 85                 | 3.1%                        |
| Travin(149)     | 2.2 (1.3)             | 1970   | NS / 40             | 23  | NS     | NS  | 63 (1.5%)                   | 3207                  | 180                | 2.6%                        |
| Uebleis(150)    | 5.4 (2.9–8.2)         | 174    | NS / NS             | NS  | NS     | NS  | 18 (1.9%)                   | 260                   | 23                 | 1.6%                        |
| Uthamalgam(151) | 1.2 (0.6)             | 43     | 2 / 1               | 0   | 5*     | NS  | 1 (1.9%)                    |                       |                    |                             |
| Vanzetto(66)    | 6.0 (1.5)             | 388    | NS / 7              | 6   | NS     | NS  | 13 (0.6%)                   | 1137                  | 103                | 1.5%                        |
| Wolak(152)      | 6.0 (2.7)             | 11,812 | 945 / 146           | 359 | NS     | NS  | 505 (0.7%)                  |                       |                    |                             |
| Yang(153)       | 4.2 (1.6)             | 155    | NS / 0              | 3   | 7      | NS  | 3 (0.5%)                    |                       |                    |                             |
| Zanco(67)       | 3.6 (NS)              | 74     | NS / 1              | 2   | NS     | NS  | 3 (1.1%)                    | 147                   | 9                  | 1.7%                        |

AER=annual event rate, MI=myocardial infarction, N=number of patients, NS=not specified, Revasc=revascularization, SD=standard deviation, UAP=unstable angina pectoris.

\* Represents (possible) early revascularizations.

**Table: Annualized event rate of cardiac death and myocardial infarction in studies comparing two modalities.**

| Author (ref. #)    | Modality | Cardiac death + MI (AER, %) | Total n | Death/ cardiac death | MI  | Revasc | UAP |
|--------------------|----------|-----------------------------|---------|----------------------|-----|--------|-----|
| Chen(6)            | CCTA     | 0.8%                        | 106     | NS/0                 | 1   | NS     | 0   |
|                    | CMRp     | 0.0%                        | 108     | 0/0                  | 0   |        | NS  |
| Cho(7)             | CCTA     | 0.0%                        | 2568    | NS/1                 | 2   | 16     | 3   |
|                    | EET      | 0.0%                        | 2489    | NS/1                 | 3   | 48     | 2   |
| Dedic(12)          | CCTA     | 0.4%                        | 277     | NS/1                 | 2   | 3      | 3   |
|                    | EET      | 0.2%                        | 172     | NS/0                 | 1   | 6      | 3   |
| Bouzas             | EET      | 1.0%                        | 4004    | 313/63               | 120 | 197    | NS  |
| Mosquera(51)       | SE       | 0.8%                        | 3335    | NS/NS                | NS  | NS     | NS  |
| Calasans(52)       | EET      | 0.6%                        | 397     | 13//3                | 13  | NS     | NS  |
|                    | SE       | 0.5%                        | 329     | NS/NS                | NS  | NS     | NS  |
| Coletta(55)        | EET      | 0.7%                        | 109     | 0/0                  | 1   | NS     | NS  |
|                    | SE       | 1.4%                        | 222     | NS/2                 | 2   | NS     | 6   |
| Sawada(65)         | EET      | 0.5%                        | 79      | 0/0                  | 1   | 2      | NS  |
|                    | SE       | 0.6%                        | 148     | NS/0                 | 2   | 4      | NS  |
| Hartlage(37)       | CMRp     | 0.0%                        | 82      | 0/0                  | 0   | 0      | 0   |
|                    | SE       | 0.7%                        | 164     | 0/0                  | 1   | 0      | 1   |
| Chatziinoannou(54) | EET      | 0.5%                        | 288     | NS/NS                | NS  | 14     | NS  |
|                    | SPECT    | 0.0%                        | 231     | NS/0                 | 0   | 4      | NS  |
| Vanzetto(66)       | EET      | 1.0%                        | 601     | NS/16                | 19  | NS     | NS  |
|                    | SPECT    | 0.6%                        | 388     | NS/7                 | 6   | NS     | NS  |
| Zanco(67)          | EET      | 2.2%                        | 63      | NS/3                 | 2   | NS     | 6   |
|                    | SPECT    | 1.1%                        | 74      | NS/1                 | 2   | NS     | NS  |
| Olmos(94)          | SE       | 0.9%                        | 117     | NS/1                 | 3   | 5      | 3   |
|                    | SPECT    | 0.9%                        | 115     | NS/1                 | 3   | NS     | NS  |

AER=annual event rate, MI=myocardial infarction, N=number of patients, NS=not specified, Revasc=revascularization, UAP=unstable angina pectoris.

## REFERENCES

1. Abidov A, Gallagher MJ, Chinnaiyan KM, Mehta LS, Wegner JH, Raff GL. Clinical effectiveness of coronary computed tomographic angiography in the triage of patients to cardiac catheterization and revascularization after inconclusive stress testing: results of a 2-year prospective trial. *J Nucl Cardiol* 2009;16:701-13.
2. Aggarwal NR, Knickelbine T, Tande A, Stoltzfus L, Lesser JR, Schwartz RS. Noncalcified plaque: relationship between results of multislice computed tomography, risk factors, and late clinical outcome. *Catheterization and cardiovascular interventions : official journal of the Society for Cardiac Angiography & Interventions* 2011;78:1116-24.
3. Aldrovandi A, Maffei E, Seitun S et al. Major adverse cardiac events and the severity of coronary atherosclerosis assessed by computed tomography coronary angiography in an outpatient population with suspected or known coronary artery disease. *J Thorac Imaging* 2012;27:23-8.
4. Andreini D, Pontone G, Mushtaq S et al. A long-term prognostic value of coronary CT angiography in suspected coronary artery disease. *JACC Cardiovasc Imaging* 2012;5:690-701.
5. Carrigan TP, Nair D, Schoenhagen P et al. Prognostic utility of 64-slice computed tomography in patients with suspected but no documented coronary artery disease. *Eur Heart J* 2009;30:362-71.
6. Chen MY, Bandettini WP, Shanbhag SM et al. Concordance and diagnostic accuracy of vasodilator stress cardiac MRI and 320-detector row coronary CTA. *Int J Cardiovasc Imaging* 2014;30:109-19.
7. Cho I, Shim J, Chang HJ et al. Prognostic value of multidetector coronary computed tomography angiography in relation to exercise electrocardiogram in patients with suspected coronary artery disease. *J Am Coll Cardiol* 2012;60:2205-15.



8. Chong FY, Soon K, Brown F, Bell K, Lim YL. Negative coronary CT angiography for chest pain assessment predicts low event rate in 5 years. *J Med Imaging Radiat Oncol* 2012;56:55-7.
9. Chow BJ, Wells GA, Chen L et al. Prognostic value of 64-slice cardiac computed tomography severity of coronary artery disease, coronary atherosclerosis, and left ventricular ejection fraction. *Journal of the American College of Cardiology* 2010;55:1017-28.
10. Christiaens L, Duchat F, Boudiaf M et al. Impact of 64-slice coronary CT on the management of patients presenting with acute chest pain: results of a prospective two-centre study. *Eur Radiol* 2012;22:1050-8.
11. Danciu SC, Herrera CJ, Stecy PJ, Carell E, Saltiel F, Hines JL. Usefulness of multislice computed tomographic coronary angiography to identify patients with abnormal myocardial perfusion stress in whom diagnostic catheterization may be safely avoided. *Am J Cardiol* 2007;100:1605-8.
12. Dedic A, Genders TS, Ferket BS et al. Stable angina pectoris: head-to-head comparison of prognostic value of cardiac CT and exercise testing. *Radiology* 2011;261:428-36.
13. Gilard M, Le Gal G, Cornily JC et al. Midterm prognosis of patients with suspected coronary artery disease and normal multislice computed tomographic findings: a prospective management outcome study. *Arch Intern Med* 2007;167:1686-9.
14. Gopal A, Nasir K, Ahmadi N et al. Cardiac computed tomographic angiography in an outpatient setting: an analysis of clinical outcomes over a 40-month period. *J Cardiovasc Comput Tomogr* 2009;3:90-5.
15. La Grutta L, Runza G, Gentile G et al. Prognostic outcome of routine clinical noninvasive multidetector-row computed tomography coronary angiography in patients with suspected coronary artery disease: a 2-year follow-up study. *Radiol Med* 2011;116:521-31.
16. Hadamitzky M, Taubert S, Deseive S et al. Prognostic value of coronary computed tomography angiography during 5 years of follow-up in patients with suspected coronary artery disease. *Eur Heart J* 2013;34:3277-85.

17. Hansen M, Ginns J, Seneviratne S et al. The value of dual-source 64-slice CT coronary angiography in the assessment of patients presenting to an acute chest pain service. *Heart Lung Circ* 2010;19:213-8.
18. Hay CS, Morse RJ, Morgan-Hughes GJ, Gosling O, Shaw SR, Roobottom CA. Prognostic value of coronary multidetector CT angiography in patients with an intermediate probability of significant coronary heart disease. *Br J Radiol* 2010;83:327-30.
19. Hollander JE, Chang AM, Shofer FS et al. One-year outcomes following coronary computerized tomographic angiography for evaluation of emergency department patients with potential acute coronary syndrome. *Acad Emerg Med* 2009;16:693-8.
20. Ko BS, Wong DT, Cameron JD et al. 320-row CT coronary angiography predicts freedom from revascularisation and acts as a gatekeeper to defer invasive angiography in stable coronary artery disease: a fractional flow reserve-correlated study. *Eur Radiol* 2014;24:738-47.
21. Van Lingen R, Kakani N, Veitch A, Manghat NE, Roobottom CA, Morgan-Hughes GJ. Prognostic and accuracy data of multidetector CT coronary angiography in an established clinical service. *Clin Radiol* 2009;64:601-7.
22. Min JK, Feignoux J, Treutenaere J, Laperche T, Sablayrolles J. The prognostic value of multidetector coronary CT angiography for the prediction of major adverse cardiovascular events: a multicenter observational cohort study. *Int J Cardiovasc Imaging* 2010;26:721-8.
23. Miszalski-Jamka T, Klimeczek P, Banys R et al. The composition and extent of coronary artery plaque detected by multislice computed tomographic angiography provides incremental prognostic value in patients with suspected coronary artery disease. *Int J Cardiovasc Imaging* 2012;28:621-31.
24. Nasis A, Meredith IT, Nerlekar N et al. Acute chest pain investigation: utility of cardiac CT angiography in guiding troponin measurement. *Radiology* 2011;260:381-9.
25. Noda M, Takagi A, Kuwatsuru R, Mitsuhashi N, Kasanuki H. Prognostic significance of multiple-detector computed tomography in conjunction with TIMI risk score for patients with non-ST elevation acute coronary syndrome. *Heart Vessels* 2008;23:161-6.

26. Ovrehus KA, Botker HE, Jensen JM, Munkholm H, Johnsen SP, Norgaard BL. Influence of coronary computed tomographic angiography on patient treatment and prognosis in patients with suspected stable angina pectoris. *Am J Cardiol* 2011;107:1473-9.
27. Rubinshtein R, Gaspar T, Lewis BS, Prasad A, Peled N, Halon DA. Long-term prognosis and outcome in patients with a chest pain syndrome and myocardial bridging: a 64-slice coronary computed tomography angiography study. *Eur Heart J Cardiovasc Imaging* 2013;14:579-85.
28. Schmermund A, Elsasser A, Behl M et al. Comparison of prognostic usefulness (three years) of computed tomographic angiography versus 64-slice computed tomographic calcium scanner in subjects without significant coronary artery disease. *Am J Cardiol* 2010;106:1574-9.
29. Yamamoto H, Kitagawa T, Ohashi N et al. Noncalcified atherosclerotic lesions with vulnerable characteristics detected by coronary CT angiography and future coronary events. *J Cardiovasc Comput Tomogr* 2013;7:192-9.
30. Yiu KH, de Graaf FR, Schuijf JD et al. Age- and gender-specific differences in the prognostic value of CT coronary angiography. *Heart* 2012;98:232-7.
31. Bertaso AG, Richardson JD, Wong DT et al. Prognostic value of adenosine stress perfusion cardiac MRI with late gadolinium enhancement in an intermediate cardiovascular risk population. *International journal of cardiology* 2012.
32. Bingham SE, Hachamovitch R. Incremental prognostic significance of combined cardiac magnetic resonance imaging, adenosine stress perfusion, delayed enhancement, and left ventricular function over preimaging information for the prediction of adverse events. *Circulation* 2011;123:1509-18.
33. Bodi V, Sanchis J, Lopez-Lereu MP et al. Prognostic and therapeutic implications of dipyridamole stress cardiovascular magnetic resonance on the basis of the ischaemic cascade. *Heart* 2009;95:49-55.

34. Coelho-Filho OR, Seabra LF, Mongeon FP et al. Stress myocardial perfusion imaging by CMR provides strong prognostic value to cardiac events regardless of patient's sex. *JACC Cardiovasc Imaging* 2011;4:850-61.
35. Doesch C, Seeger A, Doering J et al. Risk stratification by adenosine stress cardiac magnetic resonance in patients with coronary artery stenoses of intermediate angiographic severity. *JACC Cardiovasc Imaging* 2009;2:424-33.
36. Freed BH, Narang A, Bhave NM et al. Prognostic value of normal regadenoson stress perfusion cardiovascular magnetic resonance. *J Cardiovasc Magn Reson* 2013;15:108.
37. Hartlage G, Janik M, Anadiotis A et al. Prognostic value of adenosine stress cardiovascular magnetic resonance and dobutamine stress echocardiography in patients with low-risk chest pain. *Int J Cardiovasc Imaging* 2011.
38. Ingkanisorn WP, Kwong RY, Bohme NS et al. Prognosis of negative adenosine stress magnetic resonance in patients presenting to an emergency department with chest pain. *J Am Coll Cardiol* 2006;47:1427-32.
39. Lo KY, Leung KF, Chu CM, Loke KL, Chan CK, Yue CS. Prognostic value of adenosine stress myocardial perfusion by cardiac magnetic resonance imaging in patients with known or suspected coronary artery disease. *QJM* 2011;104:425-32.
40. Lubbers DD, Rijlaarsdam-Hermesen D, Kuijpers D et al. Performance of adenosine "stress-only" perfusion MRI in patients without a history of myocardial infarction: a clinical outcome study. *Int J Cardiovasc Imaging* 2012;28:109-15.
41. Macwar RR, Williams BA, Shirani J. Prognostic value of adenosine cardiac magnetic resonance imaging in patients presenting with chest pain. *Am J Cardiol* 2013;112:46-50.
42. Pilz G, Jeske A, Klos M et al. Prognostic value of normal adenosine-stress cardiac magnetic resonance imaging. *Am J Cardiol* 2008;101:1408-12.

43. Bodi V, Husser O, Sanchis J et al. Prognostic implications of dipyridamole cardiac MR imaging: a prospective multicenter registry. *Radiology* 2012;262:91-100.
44. Gebker R, Jahnke C, Manka R et al. The role of dobutamine stress cardiovascular magnetic resonance in the clinical management of patients with suspected and known coronary artery disease. *J Cardiovasc Magn Reson* 2011;13:46.
45. Kelle S, Chiribiri A, Vierecke J et al. Long-term prognostic value of dobutamine stress CMR. *JACC Cardiovasc Imaging* 2011;4:161-72.
46. Korosoglou G, Elhmidi Y, Steen H et al. Prognostic value of high-dose dobutamine stress magnetic resonance imaging in 1,493 consecutive patients: assessment of myocardial wall motion and perfusion. *J Am Coll Cardiol* 2010;56:1225-34.
47. Kuijpers D, van Dijkman PR, Janssen CH, Vliegthart R, Zijlstra F, Oudkerk M. Dobutamine stress MRI. Part II. Risk stratification with dobutamine cardiovascular magnetic resonance in patients suspected of myocardial ischemia. *Eur Radiol* 2004;14:2046-52.
48. Wallace EL, Morgan TM, Walsh TF et al. Dobutamine cardiac magnetic resonance results predict cardiac prognosis in women with known or suspected ischemic heart disease. *JACC Cardiovasc Imaging* 2009;2:299-307.
49. Bigi R, Cortigiani L, Gregori D, Fiorentini C. Comparison of the prognostic value of the stress-recovery index versus standard electrocardiographic criteria in patients with a negative exercise electrocardiogram. *Am J Cardiol* 2007;100:605-9.
50. Bourque JM, Charlton GT, Holland BH, Belyea CM, Watson DD, Beller GA. Prognosis in patients achieving  $\geq 10$  METS on exercise stress testing: was SPECT imaging useful? *J Nucl Cardiol* 2011;18:230-7.
51. Bouzas-Mosquera A, Peteiro J, Alvarez-Garcia N et al. Prediction of mortality and major cardiac events by exercise echocardiography in patients with normal exercise electrocardiographic testing. *J Am Coll Cardiol* 2009;53:1981-90.
52. Calasans FR, Santos BF, Silveira DC et al. Stress echocardiography and major cardiac events in patients with normal exercise test. *Arq Bras Cardiol* 2013;101:35-42.

53. Cannan CR, Miller TD, Christian TF, Bailey KR, Gibbons RJ. Prognosis with abnormal thallium images in the absence of significant coronary artery disease. *Am J Cardiol* 1992;70:1276-80.
54. Chatziioannou SN, Moore WH, Ford PV et al. Prognostic value of myocardial perfusion imaging in patients with high exercise tolerance. *Circulation* 1999;99:867-72.
55. Coletta C, Galati A, Greco G et al. Prognostic value of high dose dipyridamole echocardiography in patients with chronic coronary artery disease and preserved left ventricular function. *J Am Coll Cardiol* 1995;26:887-94.
56. Houghton JL, Price C, Chatterjee B, Adams KF. Short-term prognosis in females with no or insignificant coronary disease and a diagnostic exercise test. *J Cardiopulmonary Rehabil* 1990;10:58-64.
57. Jeetley P, Burden L, Senior R. Stress echocardiography is superior to exercise ECG in the risk stratification of patients presenting with acute chest pain with negative Troponin. *Eur J Echocardiogr* 2006;7:155-64.
58. Lichtlen PR, Bargheer K, Wenzlaff P. Long-term prognosis of patients with anginalike chest pain and normal coronary angiographic findings. *J Am Coll Cardiol* 1995;25:1013-8.
59. Marshall AJ, Hutchings F, James AJ, Kelion AD. Prognostic value of a nine-minute treadmill test in patients undergoing myocardial perfusion scintigraphy. *Am J Cardiol* 2010;106:1423-8.
60. Mulcahy D, Parameshwar J, Holdright D et al. Value of ambulatory ST segment monitoring in patients with chronic stable angina: does measurement of the "total ischaemic burden" assist with management? *Br Heart J* 1992;67:47-52.
61. Niemann T, Labouriau R, Sorensen HT, Thorsgaard N, Nielsen TT. Five-year cardiovascular and all-cause mortality, and myocardial infarction in all subjects referred for exercise testing in two Danish counties. *Scand Cardiovasc J* 2004;38:137-42.

62. Pontone G, Andreini D, Bartorelli AL et al. A long-term prognostic value of CT angiography and exercise ECG in patients with suspected CAD. *JACC Cardiovasc Imaging* 2013;6:641-50.
63. Raiker K, Sinusas AJ, Wackers FJ, Zaret BL. One-year prognosis of patients with normal planar or single-photon emission computed tomographic technetium 99m-labeled sestamibi exercise imaging. *J Nucl Cardiol* 1994;1:449-56.
64. Sanchis J, Bodi V, Llacer A et al. Risk stratification of patients with acute chest pain and normal troponin concentrations. *Heart* 2005;91:1013-8.
65. Sawada SG, Ryan T, Conley MJ, Corya BC, Feigenbaum H, Armstrong WF. Prognostic value of a normal exercise echocardiogram. *Am Heart J* 1990;120:49-55.
66. Vanzetto G, Ormezzano O, Fagret D, Comet M, Denis B, Machecourt J. Long-term additive prognostic value of thallium-201 myocardial perfusion imaging over clinical and exercise stress test in low to intermediate risk patients : study in 1137 patients with 6-year follow-up. *Circulation* 1999;100:1521-7.
67. Zanco P, Zampiero A, Favero A et al. Myocardial technetium-99m sestamibi single-photon emission tomography as a prognostic tool in coronary artery disease: multivariate analysis in a long-term prospective study. *Eur J Nucl Med* 1995;22:1023-8.
68. Chow BJ, Wong JW, Yoshinaga K et al. Prognostic significance of dipyridamole-induced ST depression in patients with normal <sup>82</sup>Rb PET myocardial perfusion imaging. *J Nucl Med* 2005;46:1095-101.
69. Chow BJ, Al Shammeri OM, Beanlands RS et al. Prognostic value of treadmill exercise and dobutamine stress positron emission tomography. *Can J Cardiol* 2009;25:e220-4.
70. Dorbala S, Hachamovitch R, Curillova Z et al. Incremental prognostic value of gated Rb-82 positron emission tomography myocardial perfusion imaging over clinical variables and rest LVEF. *JACC Cardiovasc Imaging* 2009;2:846-54.

71. Van Tosh A, Supino PG, Nichols KJ, Garza D, Horowitz SF, Reichek N. Prognosis of a normal positron emission tomography  $^{82}\text{Rb}$  myocardial perfusion imaging study in women with no history of coronary disease. *Cardiology* 2011;117:301-6.
72. Afridi I, Quinones MA, Zoghbi WA, Cheirif J. Dobutamine stress echocardiography: sensitivity, specificity, and predictive value for future cardiac events. *Am Heart J* 1994;127:1510-5.
73. Almeida MC, Markman Filho B. Prognostic value of dipyridamole stress echocardiography in women. *Arq Bras Cardiol* 2011;96:31-7.
74. Anthopoulos LP, Bonou MS, Kardaras FG et al. Stress echocardiography in elderly patients with coronary artery disease: applicability, safety and prognostic value of dobutamine and adenosine echocardiography in elderly patients. *J Am Coll Cardiol* 1996;28:52-9.
75. Baldini U, Dini FL, Raugi M, Genovesi-Ebert A. Incremental prognostic value of stress echo positivity in the left anterior descending coronary artery territory. *Int J Cardiol* 2006;109:381-6.
76. Bholasingh R, Cornel JH, Kamp O et al. Prognostic value of predischARGE dobutamine stress echocardiography in chest pain patients with a negative cardiac troponin T. *J Am Coll Cardiol* 2003;41:596-602.
77. Biagini E, Elhendy A, Schinkel AF et al. Long-term prediction of mortality in elderly persons by dobutamine stress echocardiography. *J Gerontol A Biol Sci Med Sci* 2005;60:1333-8.
78. Chuah SC, Pellikka PA, Roger VL, McCully RB, Seward JB. Role of dobutamine stress echocardiography in predicting outcome in 860 patients with known or suspected coronary artery disease. *Circulation* 1998;97:1474-80.
79. Chung G, Krishnamani R, Senior R. Prognostic value of normal stress echocardiogram in patients with suspected coronary artery disease-- a British general hospital experience. *Int J Cardiol* 2004;94:181-6.
80. Ciaroni S, Bloch A, Hoffmann JL, Bettoni M, Fournet D. Prognostic value of dobutamine echocardiography in patients with intermediate coronary lesions at angiography. *Echocardiography* 2002;19:549-53.



81. Colon PJ, 3rd, Guarisco JS, Murgo J, Cheirif J. Utility of stress echocardiography in the triage of patients with atypical chest pain from the emergency department. *The American journal of cardiology* 1998;82:1282-4, A10.
82. Cordovil A, Junior WM, Andrade JL et al. Role of dobutamine-atropine stress echocardiography in prognostic evaluation of 300 women. *Echocardiography* 2004;21:113-8.
83. Cortigiani L, Gigli G, Vallebona A, Mariani PR, Bigi R, Desideri A. The stress echo prognostic gender gap. *Eur J Echocardiogr* 2001;2:132-8.
84. Davar JI, Brull DJ, Bulughipitiya S, Coghlan JG, Lipkin DP, Evans TR. Prognostic value of negative dobutamine stress echo in women with intermediate probability of coronary artery disease. *Am J Cardiol* 1999;83:100-2, A8.
85. Isma'eel H, Shamseddeen W, El Khoury M, Dimassi A, Nasrallah A, Arnaout MS. Diabetes supersedes dobutamine stress echocardiography in predicting cardiac events in female patients. *Clin Exp Obstet Gynecol* 2010;37:197-200.
86. Ismail G, Lo E, Sada M, Conant RD, Shapiro SM, Ginzton LE. Long-term prognosis of patients with a normal exercise echocardiogram and clinical suspicion of myocardial ischemia. *Am J Cardiol* 1995;75:934-6.
87. Kamaran M, Teague SM, Finkelhor RS, Dawson N, Bahler RC. Prognostic value of dobutamine stress echocardiography in patients referred because of suspected coronary artery disease. *Am J Cardiol* 1995;76:887-91.
88. Krivokapich J, Child JS, Gerber RS, Lem V, Moser D. Prognostic usefulness of positive or negative exercise stress echocardiography for predicting coronary events in ensuing twelve months. *Am J Cardiol* 1993;71:646-51.
89. Krivokapich J, Child JS, Walter DO, Garfinkel A. Prognostic value of dobutamine stress echocardiography in predicting cardiac events in patients with known or suspected coronary artery disease. *J Am Coll Cardiol* 1999;33:708-16.

90. Low AF, Ng WL, Lim YT, Yeo TC. The impact of diabetes mellitus on the prognostic value of a normal dobutamine stress echocardiogram in patients with intermediate to high cardiovascular risk. *Singapore Med J* 2004;45:161-5.
91. Marcovitz PA, Shayna V, Horn RA, Hepner A, Armstrong WF. Value of dobutamine stress echocardiography in determining the prognosis of patients with known or suspected coronary artery disease. *Am J Cardiol* 1996;78:404-8.
92. Marwick TH, Lauer MS, Lobo A, Nally J, Braun W. Use of dobutamine echocardiography for cardiac risk stratification of patients with chronic renal failure. *J Intern Med* 1998;244:155-61.
93. Mesa A, Falcone M, Hernandez A, Stainback RF, Wilansky S. Long-term prognosis in women with normal dobutamine stress echocardiography. *Am J Cardiol* 1999;83:1127-9, A9.
94. Olmos LI, Dakik H, Gordon R et al. Long-term prognostic value of exercise echocardiography compared with exercise 201TI, ECG, and clinical variables in patients evaluated for coronary artery disease. *Circulation* 1998;98:2679-86.
95. Pingitore A, Picano E, Varga A et al. Prognostic value of pharmacological stress echocardiography in patients with known or suspected coronary artery disease: a prospective, large-scale, multicenter, head-to-head comparison between dipyridamole and dobutamine test. Echo-Persantine International Cooperative (EPIC) and Echo-Dobutamine International Cooperative (EDIC) Study Groups. *Journal of the American College of Cardiology* 1999;34:1769-77.
96. Sawada SG, Sayyed S, Raiesdana A, Gradus-Pizlo I, Mahenthiran J, Feigenbaum H. Clinical assessment and rest and stress echocardiography for prediction of long-term prognosis in African Americans with known or suspected coronary artery disease. *Echocardiography* 2009;26:558-66.
97. Song JK, Park SW, Kang DH et al. Prognostic implication of ergonovine echocardiography in patients with near normal coronary angiogram or negative stress test for significant fixed stenosis. *J Am Soc Echocardiogr* 2002;15:1346-52.

98. Srivastava AV, Ananthasubramaniam K, Patel SJ, Lingam N, Jacobsen G. Prognostic implications of negative dobutamine stress echocardiography in African Americans compared to Caucasians. *Cardiovasc Ultrasound* 2008;6:20.
99. Steinberg EH, Madmon L, Patel CP, Sedlis SP, Kronzon I, Cohen JL. Long-term prognostic significance of dobutamine echocardiography in patients with suspected coronary artery disease: results of a 5-year follow-up study. *J Am Coll Cardiol* 1997;29:969-73.
100. Yao SS, Qureshi E, Sherrid MV, Chaudhry FA. Practical applications in stress echocardiography: risk stratification and prognosis in patients with known or suspected ischemic heart disease. *J Am Coll Cardiol* 2003;42:1084-90.
101. Yao SS, Bangalore S, Chaudhry FA. Prognostic implications of stress echocardiography and impact on patient outcomes: an effective gatekeeper for coronary angiography and revascularization. *J Am Soc Echocardiogr* 2010;23:832-9.
102. Zagatina A, Krylova L, Vareldzhan Y, Tyurina TV, Clitsenko O, Zhuravskaya N. Comparison of 5-year outcomes for patients with coronary artery disease in groups with and without revascularization with different results of stress echocardiography. *Cardiol Res* 2013;4:152-158.
103. Acampa W, Petretta M, Cuocolo R, Daniele S, Cantoni V, Cuocolo A. Warranty period of normal stress myocardial perfusion imaging in diabetic patients: a propensity score analysis. *J Nucl Cardiol* 2013;21:50-6.
104. Akinboboye OO, Idris O, Onwuanyi A, Berekashvili K, Bergmann SR. Incidence of major cardiovascular events in black patients with normal myocardial stress perfusion study results. *J Nucl Cardiol* 2001;8:541-7.
105. Basic D, Siu SC, Skyba DM et al. Prognostic value of myocardial perfusion contrast echocardiography in patients with suggested or known ischemic heart disease. *J Am Soc Echocardiogr* 2006;19:1203-10.
106. Bom MJ, Manders JM, Uijlings R, Badings EA, Martens FM. Negative predictive value of SPECT for the occurrence of MACE in a medium-sized clinic in the Netherlands. *Neth Heart J* 2014;22:151-7.

107. Bucarius J, Joe AY, Herder E et al. Hemodynamic variables during stress testing can predict referral to early catheterization but failed to show a prognostic impact on emerging cardiac events in patients aged 70 years and older undergoing exercise (99m)Tc-sestamibi myocardial perfusion scintigraphy. *Int J Cardiovasc Imaging* 2009;25:569-79.
108. Boyne TS, Koplan BA, Parsons WJ, Smith WH, Watson DD, Beller GA. Predicting adverse outcome with exercise SPECT technetium-99m sestamibi imaging in patients with suspected or known coronary artery disease. *The American journal of cardiology* 1997;79:270-4.
109. Calnon DA, McGrath PD, Doss AL, Harrell FE, Jr., Watson DD, Beller GA. Prognostic value of dobutamine stress technetium-99m-sestamibi single-photon emission computed tomography myocardial perfusion imaging: stratification of a high-risk population. *Journal of the American College of Cardiology* 2001;38:1511-7.
110. Dawson D, Kaul S, Peters D et al. Prognostic value of dipyridamole stress myocardial contrast echocardiography: comparison with single photon emission computed tomography. *J Am Soc Echocardiogr* 2009;22:954-60.
111. Dona M, Massi L, Settimo L et al. Prognostic implications of post-stress ejection fraction decrease detected by gated SPECT in the absence of stress-induced perfusion abnormalities. *Eur J Nucl Med Mol Imaging* 2011;38:485-90.
112. Doukky R, Frogge N, Bayissa YA et al. The prognostic value of transient ischemic dilatation with otherwise normal SPECT myocardial perfusion imaging: a cautionary note in patients with diabetes and coronary artery disease. *J Nucl Cardiol* 2013;20:774-84.
113. Ferreira MJ, Cunha MJ, Albuquerque A et al. Prognosis of normal stress-only gated-SPECT myocardial perfusion imaging: a single center study. *Int J Cardiovasc Imaging* 2013;29:1639-44.
114. Filipiak-Strzecka D, Kowalczyk E, Hamala P et al. Long-term prognostic value of inducible and resting perfusion defects detected by single-photon emission computed tomography in the era of wide availability of coronary revascularization. *Clin Physiol Funct Imaging* 2013;33:218-23.

115. Galassi AR, Azzarelli S, Tomaselli A et al. Incremental prognostic value of technetium-99m-tetrofosmin exercise myocardial perfusion imaging for predicting outcomes in patients with suspected or known coronary artery disease. *The American journal of cardiology* 2001;88:101-6.
116. Gentile R, Vitarelli A, Schillaci O et al. Diagnostic accuracy and prognostic implications of stress testing for coronary artery disease in the elderly. *Ital Heart J* 2001;2:539-45.
117. Gibbons RJ, Hodge DO, Berman DS et al. Long-term outcome of patients with intermediate-risk exercise electrocardiograms who do not have myocardial perfusion defects on radionuclide imaging. *Circulation* 1999;100:2140-5.
118. Gibson PB, Demus D, Noto R, Hudson W, Johnson LL. Low event rate for stress-only perfusion imaging in patients evaluated for chest pain. *Journal of the American College of Cardiology* 2002;39:999-1004.
119. Groutars RG, Verzijlbergen JF, Zwinderman AH et al. Incremental prognostic value of myocardial SPET with dual-isotope rest (201)Tl/stress (99m)Tc-tetrofosmin. *Eur J Nucl Med Mol Imaging* 2002;29:46-52.
120. Hachamovitch R, Berman DS, Kiat H et al. Incremental prognostic value of adenosine stress myocardial perfusion single-photon emission computed tomography and impact on subsequent management in patients with or suspected of having myocardial ischemia. *The American journal of cardiology* 1997;80:426-33.
121. Hage FG, Heo J, Iskandrian AE. Adenosine-induced ST segment depression with normal perfusion. *Cardiol J* 2009;16:121-6.
122. Hakeem A, Bhatti S, Dillie KS et al. Predictive value of myocardial perfusion single-photon emission computed tomography and the impact of renal function on cardiac death. *Circulation* 2008;118:2540-9.
123. Iqbal FM, Hage FG, Ahmed A et al. Comparison of the prognostic value of normal regadenoson with normal adenosine myocardial perfusion imaging with propensity score matching. *JACC Cardiovasc Imaging* 2012;5:1014-21.

124. Jeong HJ, Lee DS, Lee HY, Choi S, Han YH, Chung JK. Prognostic Value of Normal Perfusion but Impaired Left Ventricular Function in the Diabetic Heart on Quantitative Gated Myocardial Perfusion SPECT. *Nucl Med Mol Imaging* 2013;47:151-7.
125. Kaminek M, Myslivecek M, Skvarilova M et al. Increased prognostic value of combined myocardial perfusion SPECT imaging and the quantification of lung Tl-201 uptake. *Clin Nucl Med* 2002;27:255-60.
126. Klodas E, Miller TD, Christian TF, Hodge DO, Gibbons RJ. Prognostic significance of ischemic electrocardiographic changes during vasodilator stress testing in patients with normal SPECT images. *J Nucl Cardiol* 2003;10:4-8.
127. Koehli M, Monbaron D, Prior JO et al. SPECT myocardial perfusion imaging: long-term prognostic value in diabetic patients with and without coronary artery disease. *Nuklearmedizin* 2006;45:74-81.
128. Leslie WD, Tully SA, Yogendran MS, Ward LM, Nour KA, Metge CJ. Prognostic value of automated quantification of 99mTc-sestamibi myocardial perfusion imaging. *J Nucl Med* 2005;46:204-11.
129. Lima RS, De Lorenzo A, Pantoja MR, Siqueira A. Incremental prognostic value of myocardial perfusion 99m-technetium-sestamibi SPECT in the elderly. *International journal of cardiology* 2004;93:137-43.
130. Miernik S, Kazmierczak-Dziuk A, Kaminski G, Dziuk M. The prognostic value of myocardial perfusion scintigraphy compared to coronary angiography in women with positive stress test results. *Nucl Med Rev Cent East Eur* 2012;15:31-8.
131. Mouden M, Ottervanger JP, Timmer JR et al. Myocardial perfusion imaging in stable symptomatic patients with extensive coronary atherosclerosis. *Eur J Nucl Med Mol Imaging* 2014;41:136-43.
132. Nabi F, Chang SM, Xu J, Gigliotti E, Mahmarian JJ. Assessing risk in acute chest pain: The value of stress myocardial perfusion imaging in patients admitted through the emergency department. *J Nucl Cardiol* 2012;19:233-43.

133. Nishimura T, Nakajima K, Kusuoka H, Yamashina A, Nishimura S. Prognostic study of risk stratification among Japanese patients with ischemic heart disease using gated myocardial perfusion SPECT: J-ACCESS study. *Eur J Nucl Med Mol Imaging* 2008;35:319-28.
134. Otsuka K, Fukuda S, Tanaka A et al. Prognosis of vulnerable plaque on computed tomographic coronary angiography with normal myocardial perfusion image. *Eur Heart J Cardiovasc Imaging* 2013;15:332-40.
135. Pazhenkottil AP, Ghadri JR, Nkoulou RN et al. Improved outcome prediction by SPECT myocardial perfusion imaging after CT attenuation correction. *J Nucl Med* 2011;52:196-200.
136. Petix NR, Sestini S, Coppola A et al. Prognostic value of combined perfusion and function by stress technetium-99m sestamibi gated SPECT myocardial perfusion imaging in patients with suspected or known coronary artery disease. *The American journal of cardiology* 2005;95:1351-7.
137. Raziei G, Tavakoli A, Seifollahi Asl S, Amoiei M, Javadi H, Assadi M. One-year prognosis of patients with normal myocardial perfusion imaging using technetium-99m sestamibi in suspected coronary artery disease: a single-center experience of 1,047 patients. *Perfusion* 2011;26:309-14.
138. Romero-Farina G, Candell-Riera J, Aguade-Bruix S et al. Warranty periods for normal myocardial perfusion stress SPECT. *J Nucl Cardiol* 2014;22:44-54.
139. Sharma J, Roncari C, Giedd KN, Fox JT, Kanei Y. Patients with adenosine-induced ST-segment depressions and normal myocardial perfusion imaging: cardiac outcomes at 24 months. *J Nucl Cardiol* 2010;17:874-80.
140. Schinkel AF, Elhendy A, Van Domburg RT et al. Long-term prognostic value of dobutamine stress 99mTc-sestamibi SPECT: single-center experience with 8-year follow-up. *Radiology* 2002;225:701-6.

141. Schinkel AF, Elhendy A, van Domburg RT, Bax JJ, Roelandt JR, Poldermans D. Prognostic value of dobutamine-atropine stress (99m)Tc-tetrofosmin myocardial perfusion SPECT in patients with known or suspected coronary artery disease. *J Nucl Med* 2002;43:767-72.
142. Shimoni S, Goland S, Livshitz S et al. Accuracy and long-term prognostic value of pacing stress echocardiography compared with dipyridamole t1201 emission computed tomography in patients with a permanent pacemaker and known or suspected coronary artery disease. *Cardiology* 2010;116:229-36.
143. Simonsen JA, Gerke O, Rask CK et al. Prognosis in patients with suspected or known ischemic heart disease and normal myocardial perfusion: long-term outcome and temporal risk variations. *J Nucl Cardiol* 2013;20:347-57.
144. Soman P, Parsons A, Lahiri N, Lahiri A. The prognostic value of a normal Tc-99m sestamibi SPECT study in suspected coronary artery disease. *J Nucl Cardiol* 1999;6:252-6.
145. Stratmann HG, Tamesis BR, Younis LT, Wittry MD, Miller DD. Prognostic value of dipyridamole technetium-99m sestamibi myocardial tomography in patients with stable chest pain who are unable to exercise. *The American journal of cardiology* 1994;73:647-52.
146. Stratmann HG, Williams GA, Wittry MD, Chaitman BR, Miller DD. Exercise technetium-99m sestamibi tomography for cardiac risk stratification of patients with stable chest pain. *Circulation* 1994;89:615-22.
147. Sugihara H, Tamaki N, Mitsunami K, Kinoshita M. Prognostic value of 1-day stress/rest electrocardiogram-gated single-photon emission computed tomography using Tc-99m-labeled methoxy-isobutyl isonitrile. *Jpn Circ J* 1998;62:405-8.
148. Travin MI, Duca MD, Kline GM, Herman SD, Demus DD, Heller GV. Relation of gender to physician use of test results and to the prognostic value of stress technetium 99m sestamibi myocardial single-photon emission computed tomography scintigraphy. *Am Heart J* 1997;134:73-82.



149. Travin MI, Heller GV, Johnson LL et al. The prognostic value of ECG-gated SPECT imaging in patients undergoing stress Tc-99m sestamibi myocardial perfusion imaging. *J Nucl Cardiol* 2004;11:253-62.
150. Uebleis C, Becker A, Griesshammer I et al. Stable coronary artery disease: prognostic value of myocardial perfusion SPECT in relation to coronary calcium scoring--long-term follow-up. *Radiology* 2009;252:682-90.
151. Uthamalingam S, Gurm GS, Ahmado I, Sidhu MS, Flynn J. Outcome of patients with regadenoson-induced ST-segment depression but normal perfusion on single-photon emission computed tomography. *Angiology* 2012;64:46-8.
152. Wolak A, Rafaeli E, Toledano R, Novack V, Gilutz H, Henkin Y. Attenuated predictive power of a normal myocardial perfusion scan in young smokers. *Eur J Intern Med* 2014;25:452-7.
153. Yang MF, Dou KF, Liu XJ, Yang YJ, He ZX. Prognostic value of normal exercise 99mTc-sestamibi myocardial tomography in patients with angiographic coronary artery disease. *Nucl Med Commun* 2006;27:333-8.

# Appendix F

## SE

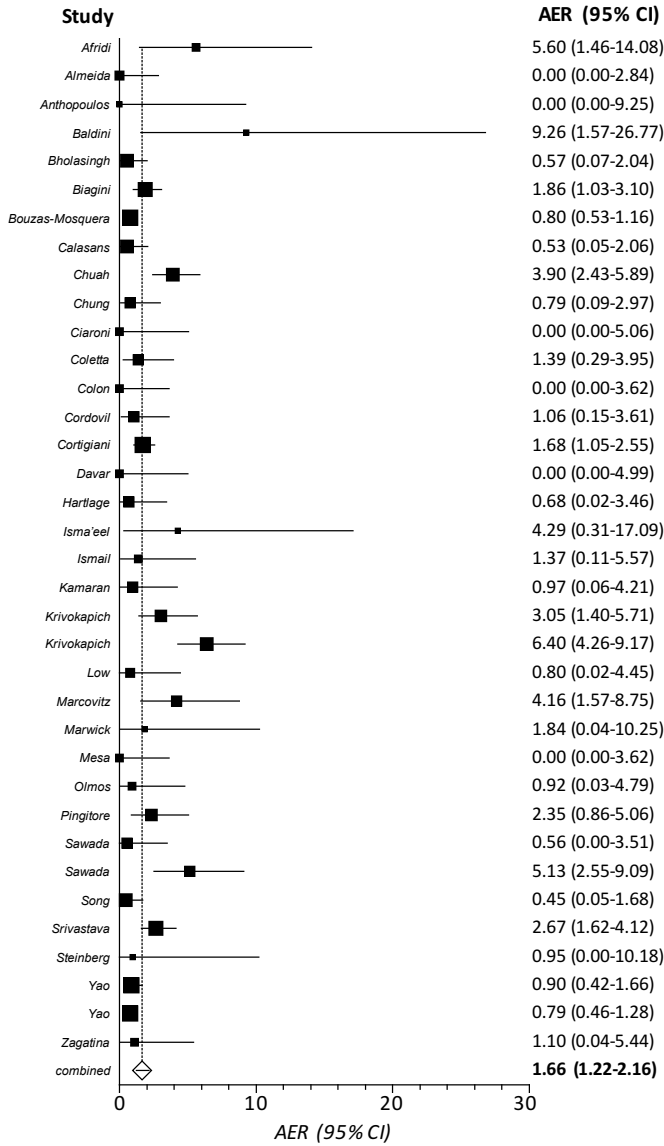

$I^2$  (inconsistency) Egger's regression test 72.4% 0.83  
 $p$ -value Egger test 0.02  
 Tau<sup>2</sup> statistics 0.007016

## PET

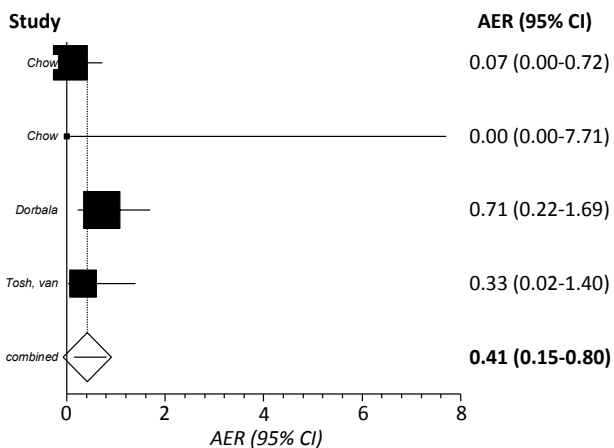

$I^2$  (inconsistency) Egger's regression test 13.1% 0.67  
 $p$ -value Egger test 0.561  
 Tau<sup>2</sup> statistics 0.000373

## SPECT

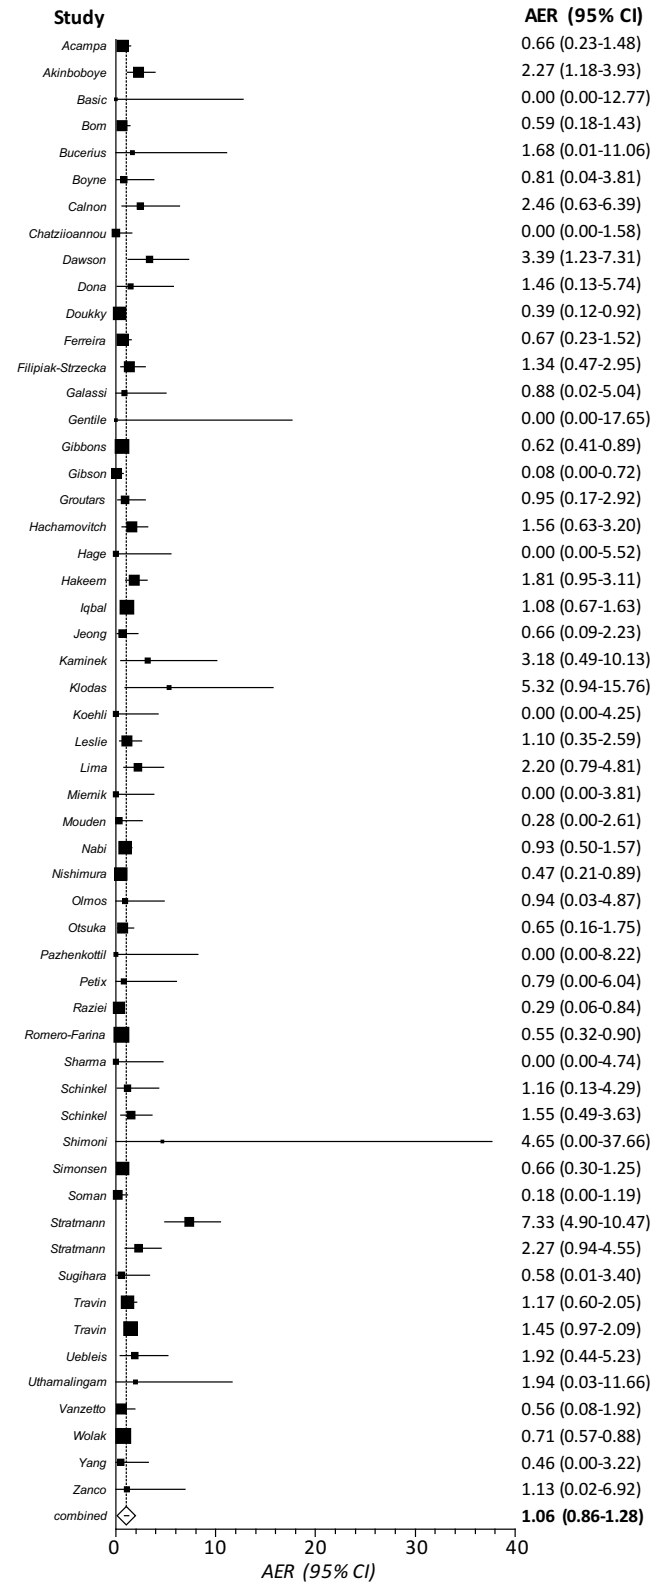

$I^2$  (inconsistency) Egger's regression test 65.2% 0.64  
 $p$ -value Egger test 0.006  
 Tau<sup>2</sup> statistics 0.002655

## CCTA

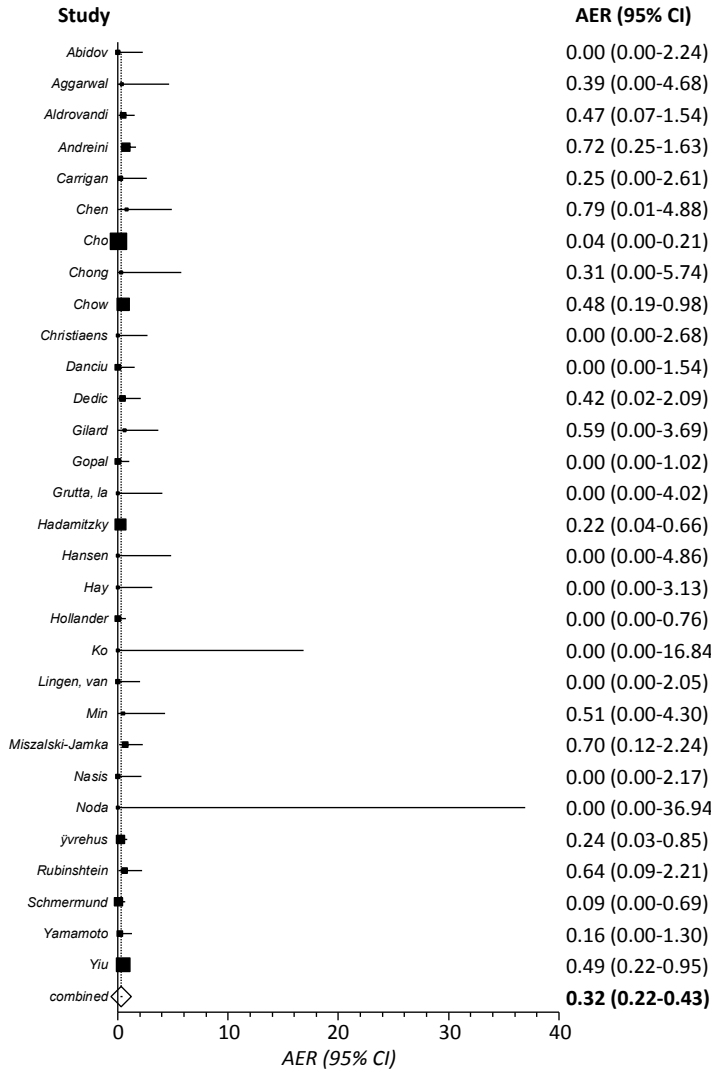

I<sup>2</sup> (inconsistency) Egger's regression p-value Egger test Tau<sup>2</sup> statistics  
 9.9 % 0.44 0.02 0.00025

## EET

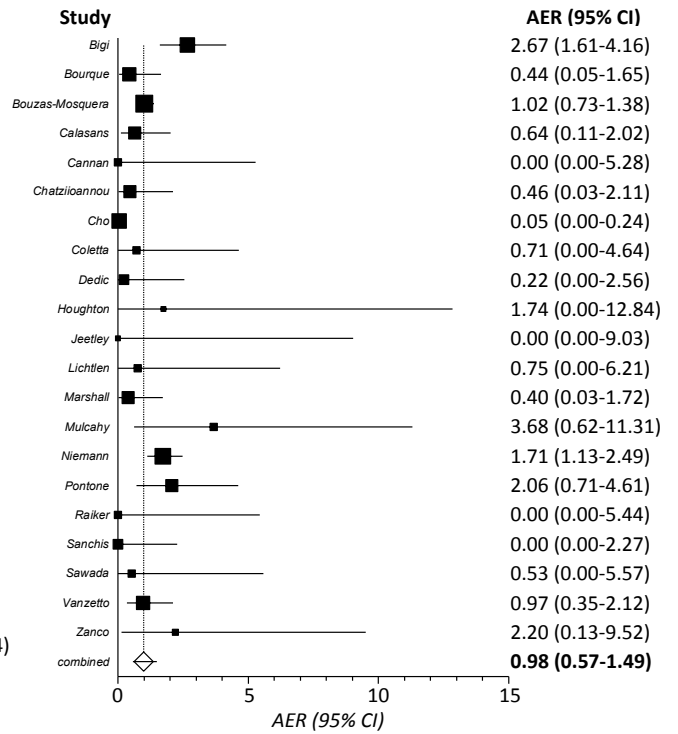

I<sup>2</sup> (inconsistency) Egger's regression p-value Egger test Tau<sup>2</sup> statistics  
 76.5% 1.16 0.017 0.006604

## CMR-perf

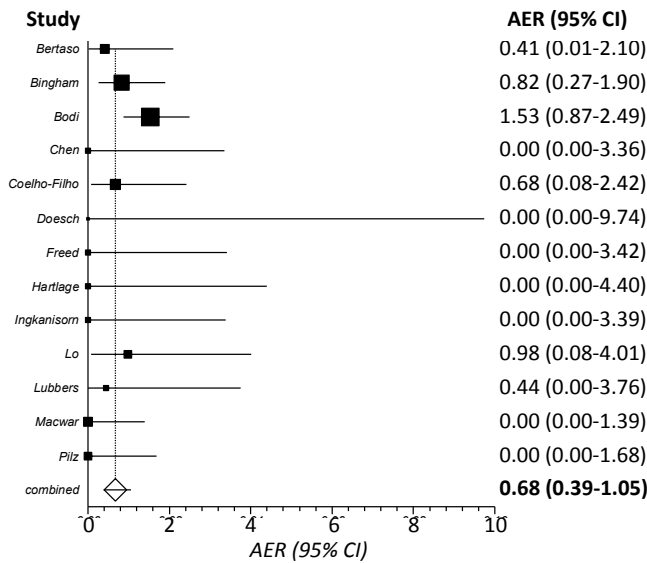

I<sup>2</sup> (inconsistency) Egger's regression p-value Egger test Tau<sup>2</sup> statistics  
 19.8 % -0.34 0.632 0.001026

## CMR-wm

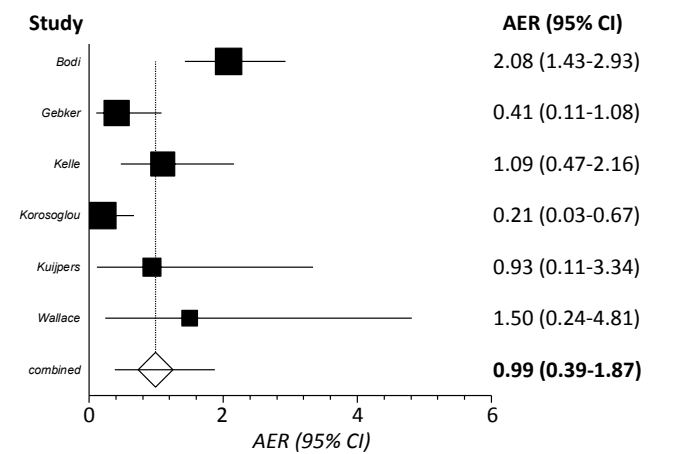

I<sup>2</sup> (inconsistency) Egger's regression p-value Egger test Tau<sup>2</sup> statistics  
 83.1% 2.38 0.167 0.006725

Appendix G

**CCTA**

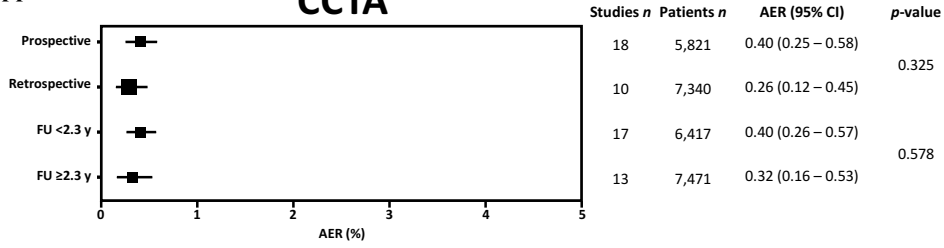

**CMR perfusion**

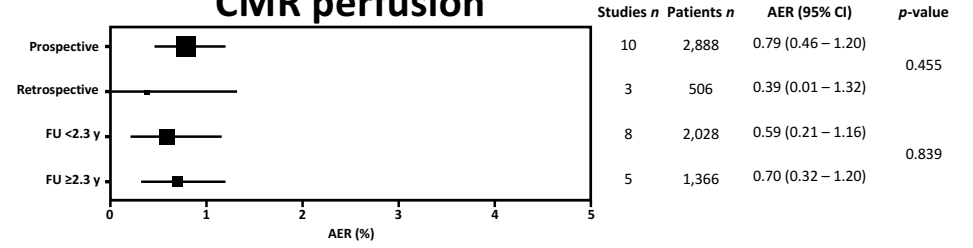

**CMR wall motion**

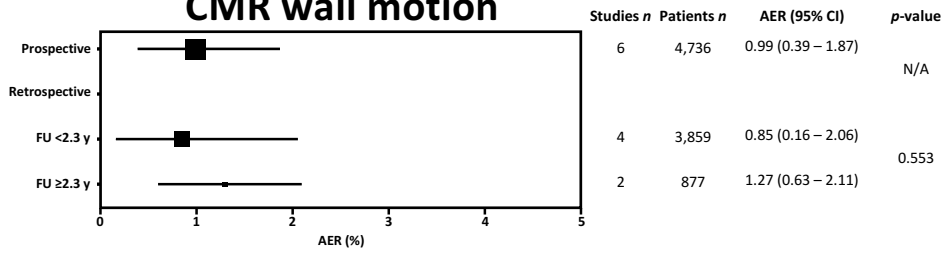

**EET**

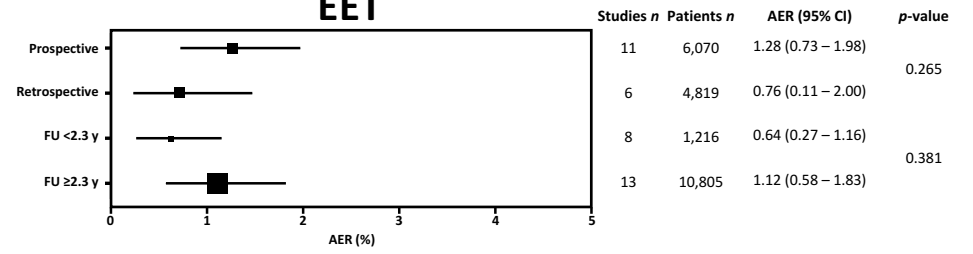

**PET**

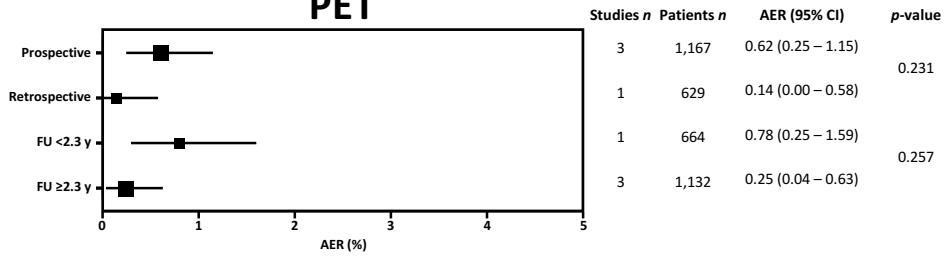

**SE**

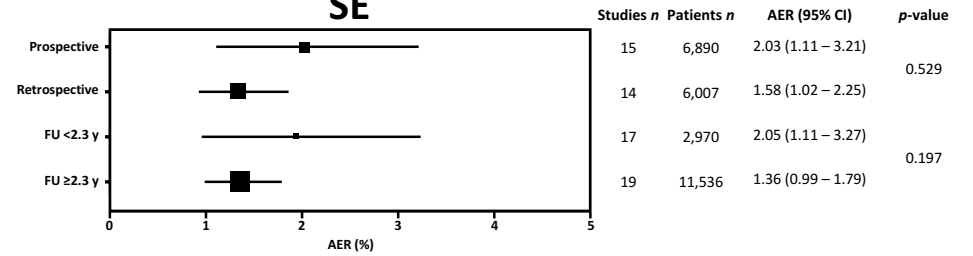

**SPECT**

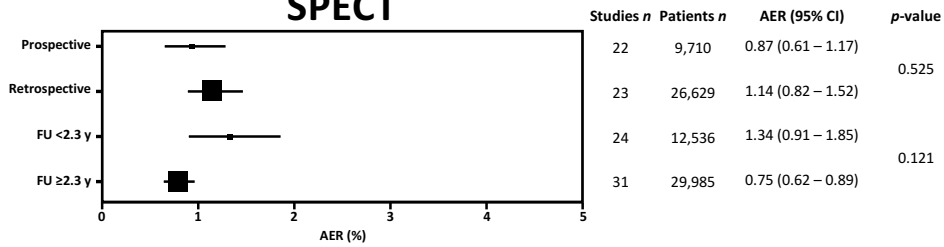

**Appendix H. Regression coefficients (B) with 95% confidence intervals from multivariable linear meta regression analysis comparing modalities with CCTA (reference category)**

| Modalities | All studies - unadjusted<br>N=165 studies                    |                               |       |                  | Restricted to suspected CAD<br>N=45 studies                                                                 |                               |        |                  |
|------------|--------------------------------------------------------------|-------------------------------|-------|------------------|-------------------------------------------------------------------------------------------------------------|-------------------------------|--------|------------------|
|            | N studies                                                    | Pooled AER neg. test (95% CI) | Beta  | p-value          | N studies                                                                                                   | Pooled AER neg. test (95% CI) | Beta   | p-value          |
| CCTA       | 30                                                           | 0.32 (0.22-0.43)              | ref   | ref              | 19                                                                                                          | 0.31 (0.19-0.47)              | ref    | ref              |
| CMR-perf   | 13                                                           | 0.68 (0.39-1.05)              | 0.035 | 0.276            | 2                                                                                                           | 0.16 (0.03-0.92)              | -0.034 | 0.613            |
| CMR-wm     | 6                                                            | 0.99 (0.39-1.87)              | 0.078 | <b>0.031</b>     | 0                                                                                                           | -                             | -      | -                |
| EET        | 21                                                           | 0.98 (0.57-1.49)              | 0.077 | <b>0.004</b>     | 7                                                                                                           | 0.68 (0.15-1.61)              | 0.029  | 0.386            |
| PET        | 4                                                            | 0.41 (0.15-0.80)              | 0.009 | 0.843            | 1                                                                                                           | 0.43 (0.04-1.24)              | 0.016  | 0.801            |
| SE         | 36                                                           | 1.66 (1.22-2.16)              | 0.138 | <b>&lt;0.001</b> | 7                                                                                                           | 0.64 (0.25-1.20)              | 0.043  | 0.268            |
| SPECT      | 55                                                           | 1.06 (0.86-1.28)              | 0.089 | <b>&lt;0.001</b> | 9                                                                                                           | 0.69 (0.40-1.06)              | 0.053  | 0.068            |
| Modalities | Subset with total AER - unadjusted<br>N=119 studies          |                               |       |                  | Adjusted for total AER<br>B: total AER (0.025, p<0.001)<br>N=119 studies                                    |                               |        |                  |
|            | N studies                                                    | Pooled AER neg. test (95% CI) | Beta  | p-value          | N studies                                                                                                   | Fitted AER neg. test (95% CI) | Beta   | p-value          |
| CCTA       | 23                                                           | 0.33 (0.22-0.46)              | ref   | ref              | 23                                                                                                          | 0.56 (0.37-0.79)              | ref    | ref              |
| CMR-perf   | 9                                                            | 0.82 (0.46-1.27)              | 0.050 | 0.184            | 9                                                                                                           | 0.79 (0.37-1.37)              | 0.028  | 0.312            |
| CMR-wm     | 5                                                            | 0.97 (0.32-1.97)              | 0.077 | 0.061            | 5                                                                                                           | 0.96 (0.51-1.56)              | 0.047  | 0.087            |
| EET        | 17                                                           | 0.90 (0.44-1.52)              | 0.066 | <b>0.037</b>     | 17                                                                                                          | 0.97 (0.58-1.46)              | 0.047  | <b>0.040</b>     |
| PET        | 2                                                            | 0.76 (0.26-1.53)              | 0.051 | 0.484            | 2                                                                                                           | 0.52 (0.04-1.54)              | -0.006 | 0.912            |
| SE         | 29                                                           | 1.77 (1.26-2.37)              | 0.145 | <b>&lt;0.001</b> | 29                                                                                                          | 1.24 (0.83-1.74)              | 0.073  | <b>&lt;0.001</b> |
| SPECT      | 34                                                           | 1.40 (1.05-1.81)              | 0.118 | <b>&lt;0.001</b> | 34                                                                                                          | 1.14 (0.77-1.59)              | 0.064  | <b>0.001</b>     |
| Modalities | Subset with total AER and % CAD - unadjusted<br>N=71 studies |                               |       |                  | Adjusted for total AER and % CAD<br>B: total AER (0.045, p<0.001), % CAD (0.00023, p=0.565)<br>N=71 studies |                               |        |                  |
|            | N studies                                                    | Pooled AER neg. test (95% CI) | Beta  | p-value          | N studies                                                                                                   | Fitted AER neg. test (95% CI) | Beta   | p-value          |
| CCTA       | 20                                                           | 0.31 (0.19-0.45)              | ref   | ref              | 20                                                                                                          | 0.77 (0.57-1.00)              | ref    | ref              |
| CMR-perf   | 7                                                            | 0.58 (0.26-1.03)              | 0.030 | 0.427            | 7                                                                                                           | 0.83 (0.34-1.53)              | 0.006  | 0.855            |
| CMR-wm     | 3                                                            | 0.55 (0.13-1.01)              | 0.032 | 0.426            | 3                                                                                                           | 0.71 (0.29-1.32)              | -0.007 | 0.817            |
| EET        | 13                                                           | 0.69 (0.28-1.27)              | 0.039 | 0.202            | 13                                                                                                          | 0.90 (0.54-1.35)              | 0.014  | 0.528            |
| PET        | 1                                                            | 0.78 (0.25-1.59)              | 0.061 | 0.367            | 1                                                                                                           | 0.33 (0.01-1.09)              | -0.061 | 0.197            |
| SE         | 12                                                           | 1.22 (0.61-2.03)              | 0.104 | <b>0.001</b>     | 12                                                                                                          | 1.22 (0.78-1.76)              | 0.045  | <b>0.048</b>     |
| SPECT      | 15                                                           | 1.29 (0.88-1.78)              | 0.112 | <b>&lt;0.001</b> | 15                                                                                                          | 1.07 (0.66-1.56)              | 0.031  | 0.165            |
